# Supplementary material
Source: PubMed Central journal article supplement (PMC7855447)
Supplement: NIHMS1659825-supplement-SI.pdf [file NIHMS1659825-supplement-SI.pdf]

Supporting information for:

## **Accelerating Post-SELEX Aptamer Engineering using Exonuclease Digestion**

Juan Canoura, Haixiang Yu, Obtin Alkhamis, Daniel Roncancio, Rifat Farhana and Yi Xiao\*

Department of Chemistry and Biochemistry, Florida International University, 11200 SW 8th Street, Miami, FL, USA, 33199.

\*Corresponding author: [yxiao2@fiu.edu](mailto:yxiao2@fiu.edu)

### **EXPERIMENTAL SECTION**

**Polyacrylamide gel electrophoresis (PAGE) analysis of digestion products.** Digestion products were analyzed by denaturing PAGE by combining 5  $\mu$ L of sample with 10  $\mu$ L of formamide loading buffer (75% formamide, 10% glycerol, 0.125% SDS, 10 mM EDTA, and 0.15% (w/v) xylene cyanol), and then loading 6  $\mu$ L of each sample into the wells of a 15% denaturing PAGE gel. Separation was carried out at 6 V/cm for 30 mins followed by 25 V/cm for 3 h in  $0.5 \times$  TBE. The gel was stained with  $1 \times$  SYBR Gold solution for 25 mins and imaged using a ChemiDoc MP Image system (Bio-Rad).

**Circular dichroism (CD) spectroscopy.** All CD experiments were performed at room temperature in 10 mM Tris-HCl, 20 mM NaCl, and 1.5 mM  $MgCl_2$  (pH 7.4) using a Jasco J-815 circular dichroism spectropolarimeter. Prior to each experiment, 1.5  $\mu$ M aptamer (final concentration) was heated to 95  $^{\circ}C$  for 10 mins in Tris buffer and then immediately cooled on ice. Afterwards, salt was added. Blank solution or ADE was then added to aptamer solution to a final concentration of 25, or 50  $\mu$ M. 300  $\mu$ L of sample was transferred into a 1 cm quartz cuvette (Hellma Analytics) for measurements. The following parameters were used: 210 to 310 nm scan range, 50 nm/min scan speed, 5 mdeg sensitivity, 4 s response time, 1 nm bandwidth, and 5 accumulation scans total. Reference spectra of reaction buffer without aptamer were taken with 0, 25, or 50  $\mu$ M ADE. Reference spectra were subtracted from CD spectra collected in the presence of aptamer with ADE. To correct for differences in nucleotide length, the CD signal was converted to the mean residue molar extinction coefficient ( $\Delta\epsilon_{MR}$ ).<sup>1</sup>

**Electrochemical measurements.** Electrochemical measurements were taken using a CHI 760 bi-potentiostat (CH Instruments). Prior to measurement, the electrodes were incubated in 10% SDS for 15 mins followed by a 20s DI water rinse, after which the electrode was stored in 10 mM Tris-HCl, 20 mM NaCl, and 1.5 mM  $MgCl_2$  (pH 7.4) reaction buffer. All measurements were performed at room temperature using a three-electrode system, including an aptamer-modified gold working electrode, a platinum wire counter electrode, and an Ag/AgCl (3M KCl) reference electrode (CH Instruments) in a 2 mL electrochemical cell. Square-wave voltammetry was used for sensor measurements, and voltammograms were collected from -0.1 to -0.4 V (vs Ag/AgCl) using a frequency of 200 Hz with an amplitude of 25 mV. Calibration curves were collected by challenging the E-AB sensors with varying concentrations of ligand dissolved in reaction buffer or 50% fetal bovine serum diluted in reaction buffer. The sensor was equilibrated for 1 min at each target concentration prior to measurements. Signal gain (SG) was calculated using Eq. (2):

$$SG = [(I - I_0)/I_0] \times 100 \quad (2)$$

where  $I_0$  and  $I$  are the peak currents obtained in the absence and presence of target, respectively. Cross-reactivity of the sensor to AMP, ADP, ATP, GTP, CTP and UTP was calculated relative to the signal gain produced by 100  $\mu$ M ADE.

**Reference:**

- (1) Fasman, G. D. *Circular Dichroism and the Conformational Analysis of Biomolecules*. Salmon Tower Building, N.Y.: Springer, **1996**.

**Table S1.** All oligonucleotide sequences used in this work.

| Sequence ID     | Sequence (5'–3')                                                  |
|-----------------|-------------------------------------------------------------------|
| OBAwt           | GGG GTG AAA CGG GTC CCG                                           |
| OBA1            | <u>CGG</u> GGT GAA ACG GGT CCC G                                  |
| OBA2            | GGG <u>GCG</u> AAG <u>CGG</u> GTC CCG                             |
| OBA3            | <u>CGG</u> GG <u>C</u> GAA <u>GCG</u> GGT CCC G                   |
| OBA4            | GGG GTG AAA CGG TCC CG                                            |
| OBA5            | <u>CCG</u> GGG <u>CGA</u> <u>AGC</u> GGG TCC <u>CGG</u>           |
| OBA6            | <u>GCG</u> GGG <u>CGA</u> <u>AGC</u> GGG TCC <u>CGC</u>           |
| ATPwt           | CGC ACC TGG GGG AGT ATT GCG GAG GAA GGT GCG                       |
| G10A            | CGC ACC TGG <u>AGG</u> AGT ATT GCG GAG GAA GGT GCG                |
| G10T            | CGC ACC TGG <u>IGG</u> AGT ATT GCG GAG GAA GGT GCG                |
| G10C            | CGC ACC TGG <u>CGG</u> AGT ATT GCG GAG GAA GGT GCG                |
| A13T            | CGC ACC TGG GGG <u>IGT</u> ATT GCG GAG GAA GGT GCG                |
| A13G            | CGC ACC TGG GGG <u>GGT</u> ATT GCG GAG GAA GGT GCG                |
| A13C            | CGC ACC TGG GGG <u>CGT</u> ATT GCG GAG GAA GGT GCG                |
| A23T            | CGC ACC TGG GGG AGT ATT GCG <u>GIG</u> GAA GGT GCG                |
| A23T-30         | CGC ACC TGG GGG AGT ATT GCG <u>GIG</u> GAA GGT                    |
| A23T-29         | CGC ACC TGG GGG AGT ATT GCG <u>GIG</u> GAA GG                     |
| A23G            | CGC ACC TGG GGG AGT ATT GCG <u>GCG</u> GAA GGT GCG                |
| A23C            | CGC ACC TGG GGG AGT ATT GCG <u>GCG</u> GAA GGT GCG                |
| A26T            | CGC ACC TGG GGG AGT ATT GCG GAG <u>GIA</u> GGT GCG                |
| A26G            | CGC ACC TGG GGG AGT ATT GCG GAG <u>GGA</u> GGT GCG                |
| A26C            | CGC ACC TGG GGG AGT ATT GCG GAG <u>GCA</u> GGT GCG                |
| G10T-A23G       | CGC ACC TGG <u>IGG</u> AGT ATT GCG <u>GCG</u> GAA GGT GCG         |
| G10T-A23G-30    | CGC ACC TGG <u>IGG</u> AGT ATT GCG <u>GCG</u> GAA GGT             |
| G10T-A23G-29    | CGC ACC TGG <u>IGG</u> AGT ATT GCG <u>GCG</u> GAA GG              |
| G10T-A23G-29-MB | /Thiol-C6/-CCT GG <u>I</u> GGA GTA TTG CGG <u>GCG</u> AAG G-/MB/  |
| A23T-29-MB      | /Thiol-C6/-CGC TCC TGG GGG AGT ATT GCG <u>GIG</u> GAAG GTT T-/MB/ |
| A10-excised     | GTA TTG CGG AGG AAG GTT TTT AAC CTT CGG GG                        |
| Tasset          | AGT CCG TGG TAG GGC AGG TTG GGG TGA CT                            |
| Bock            | GGT TGG TGT GGT TGG                                               |
| Bock-hang       | TAA GTT CAT CTC CCC GGT TGG TGT GGT TGG                           |
| IgE Aptamer     | GGG GCA CGT TTA TCC GTC CCT CCT AGT GGC GTG CCC C                 |

a. Mutated nucleotides are colored red and underlined

b. /Thiol-C6/ represents a 5' modified thiol group with a six-carbon spacer

c. /MB/ represents a 3' modified methylene blue redox reporter

**Table S2.** Ochratoxin-binding aptamers, ligands, and aptamer/ligand concentration used for ITC and determined  $K_D$ .

| Aptamer   | Ligand   | [Ligand] ( $\mu\text{M}$ ) | [Aptamer] ( $\mu\text{M}$ ) | $K_D$ ( $\mu\text{M}$ ) |
|-----------|----------|----------------------------|-----------------------------|-------------------------|
| OBA1      | OTA      | 15                         | 250                         | $5.5 \pm 0.2$           |
| OBA1      | OTB      | 15                         | 500                         | $74.1 \pm 9.5$          |
| OBA3      | OTA      | 15                         | 250                         | $1.8 \pm 0.1$           |
| OBA3      | OTB      | 15                         | 500                         | $25.5 \pm 1.2$          |
| OBA5      | OTA      | 15                         | 250                         | $3.4 \pm 0.1$           |
| OBA5      | OTB      | 15                         | 500                         | $59.9 \pm 6.9$          |
| Tasset    | Thrombin | 5                          | 50                          | $0.0136 \pm 0.0031$     |
| Bock      | Thrombin | 5                          | 50                          | $0.0231 \pm 0.0054$     |
| Bock-hang | Thrombin | 7.5                        | 75                          | $0.097 \pm 0.019$       |

**Table S3.** ATP-binding aptamers, ligands, and ligand concentration used for ITC and determined  $K_{D1}$ ,  $K_{D2}$ , and  $K_{1/2}$ .

| Aptamer      | Ligand | [Ligand]<br>( $\mu$ M) | Injection<br>volume ( $\mu$ L) | $K_{D1}$ ( $\mu$ M) | $K_{D2}$ ( $\mu$ M) | $K_{1/2}$ ( $\mu$ M) |
|--------------|--------|------------------------|--------------------------------|---------------------|---------------------|----------------------|
| ATPwt        | ADE    | 800                    | 1                              | $1.3 \pm 0.1$       | $13.7 \pm 0.3$      | $4.2 \pm 0.1$        |
| ATPwt        | AMP    | 800                    | 1                              | $6.4 \pm 0.1$       | $30.9 \pm 0.4$      | $14.1 \pm 0.2$       |
| ATPwt        | ADP    | 800                    | 1                              | $2.1 \pm 0.1$       | $19.1 \pm 0.3$      | $6.3 \pm 0.1$        |
| ATPwt        | ATP    | 800                    | 1                              | $4.4 \pm 0.1$       | $23.9 \pm 0.4$      | $10.2 \pm 0.2$       |
| A23T         | ADE    | 1,800                  | 1                              | $7.0 \pm 0.5$       | $29.1 \pm 0.6$      | $14.3 \pm 0.6$       |
| A23T-30      | ADE    | 1,800                  | 1                              | $13.1 \pm 0.5$      | $26.6 \pm 0.6$      | $18.6 \pm 1.7$       |
| A23T-29      | ADE    | 1,800                  | 1                              | $35.3 \pm 1.0$      | $39.8 \pm 0.6$      | $37.4 \pm 6.2$       |
| A23T-29      | AMP    | 1,200                  | 2                              | NA                  | NA                  | >1000                |
| A23T-29      | ADP    | 1,200                  | 2                              | $169.5 \pm 3.4$     | $480.8 \pm 9.7$     | $285.4 \pm 5.7$      |
| A23T-29      | ATP    | 1,200                  | 2                              | $327.8 \pm 17.2$    | $505.0 \pm 28.1$    | $406.3 \pm 21.8$     |
| G10T-A23G    | ADE    | 1,200                  | 1                              | $7.3 \pm 0.2$       | $32.4 \pm 0.5$      | $15.3 \pm 0.2$       |
| G10T-A23G-30 | ADE    | 1,200                  | 1                              | $8.8 \pm 0.2$       | $37.1 \pm 0.6$      | $18.1 \pm 0.4$       |
| G10T-A23G-29 | ADE    | 1,200                  | 1                              | $9.2 \pm 0.2$       | $37.4 \pm 0.6$      | $18.5 \pm 0.4$       |
| G10T-A23G-29 | AMP    | 1,200                  | 2                              | $352.1 \pm 12.4$    | $131.4 \pm 4.3$     | $214.7 \pm 7.2$      |
| G10T-A23G-29 | ADP    | 1,200                  | 2                              | $167.9 \pm 3.0$     | $142.6 \pm 2.4$     | $162.9 \pm 2.8$      |
| G10T-A23G-29 | ATP    | 1,200                  | 2                              | $50.2 \pm 1.4$      | $591.7 \pm 13.6$    | $171.9 \pm 4.3$      |
| A23G         | ADE    | 1,500                  | 1                              | $6.7 \pm 0.4$       | $28.3 \pm 0.9$      | $13.8 \pm 0.6$       |
| A23C         | ADE    | 1,500                  | 1                              | $1.5 \pm 0.1$       | $17.1 \pm 0.5$      | $5.0 \pm 0.3$        |
| A26T         | ADE    | 1,000                  | 1                              | $8.6 \pm 0.6$       | $1297 \pm 153$      | $105.6 \pm 9.5$      |
| A26G         | ADE    | 1,000                  | 1                              | $5.5 \pm 0.6$       | $3246 \pm 1897$     | $133.6 \pm 33.0$     |
| A10-excised  | ADE    | 1,000                  | 2                              | $311.5 \pm 11.3$    | NA                  | NA                   |

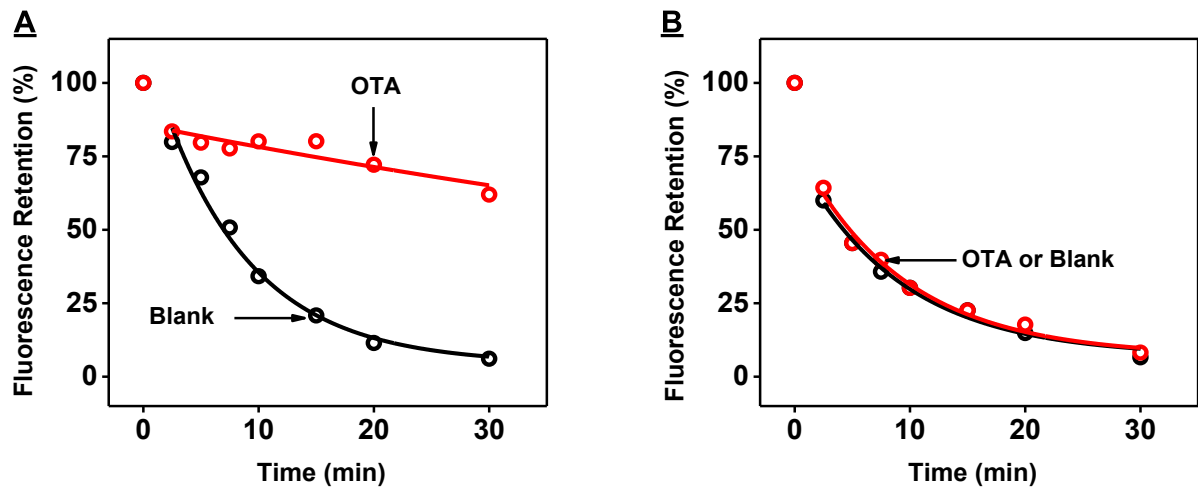

**Figure S1.** Fluorescence time-course of the digestion of (A) OBA3 and (B) OBA4 with the mixture of Exo III and Exo I in the absence (black) and presence of 100  $\mu$ M OTA (red).

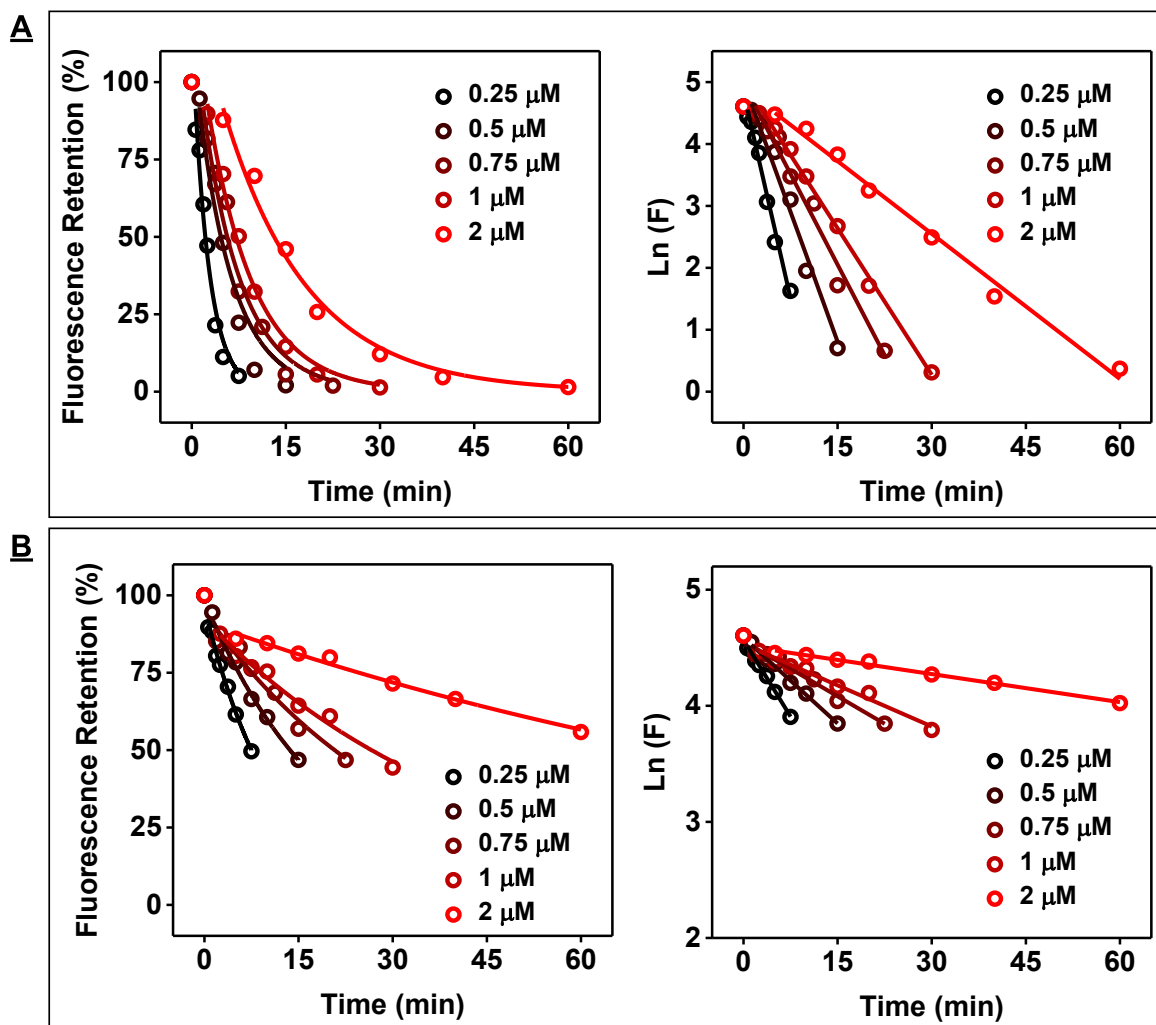

**Figure S2.** Characterization of OBA3 digestion kinetics by Exo III and Exo I. Fluorescence time-course of the digestion (left) of 0.25, 0.5, 0.75, 1, or 2  $\mu\text{M}$  OBA3 (indicated by black to red color gradient) and natural log plot (right) of fluorescence retention in the (A) absence and (B) presence of 25  $\mu\text{M}$  OTA.

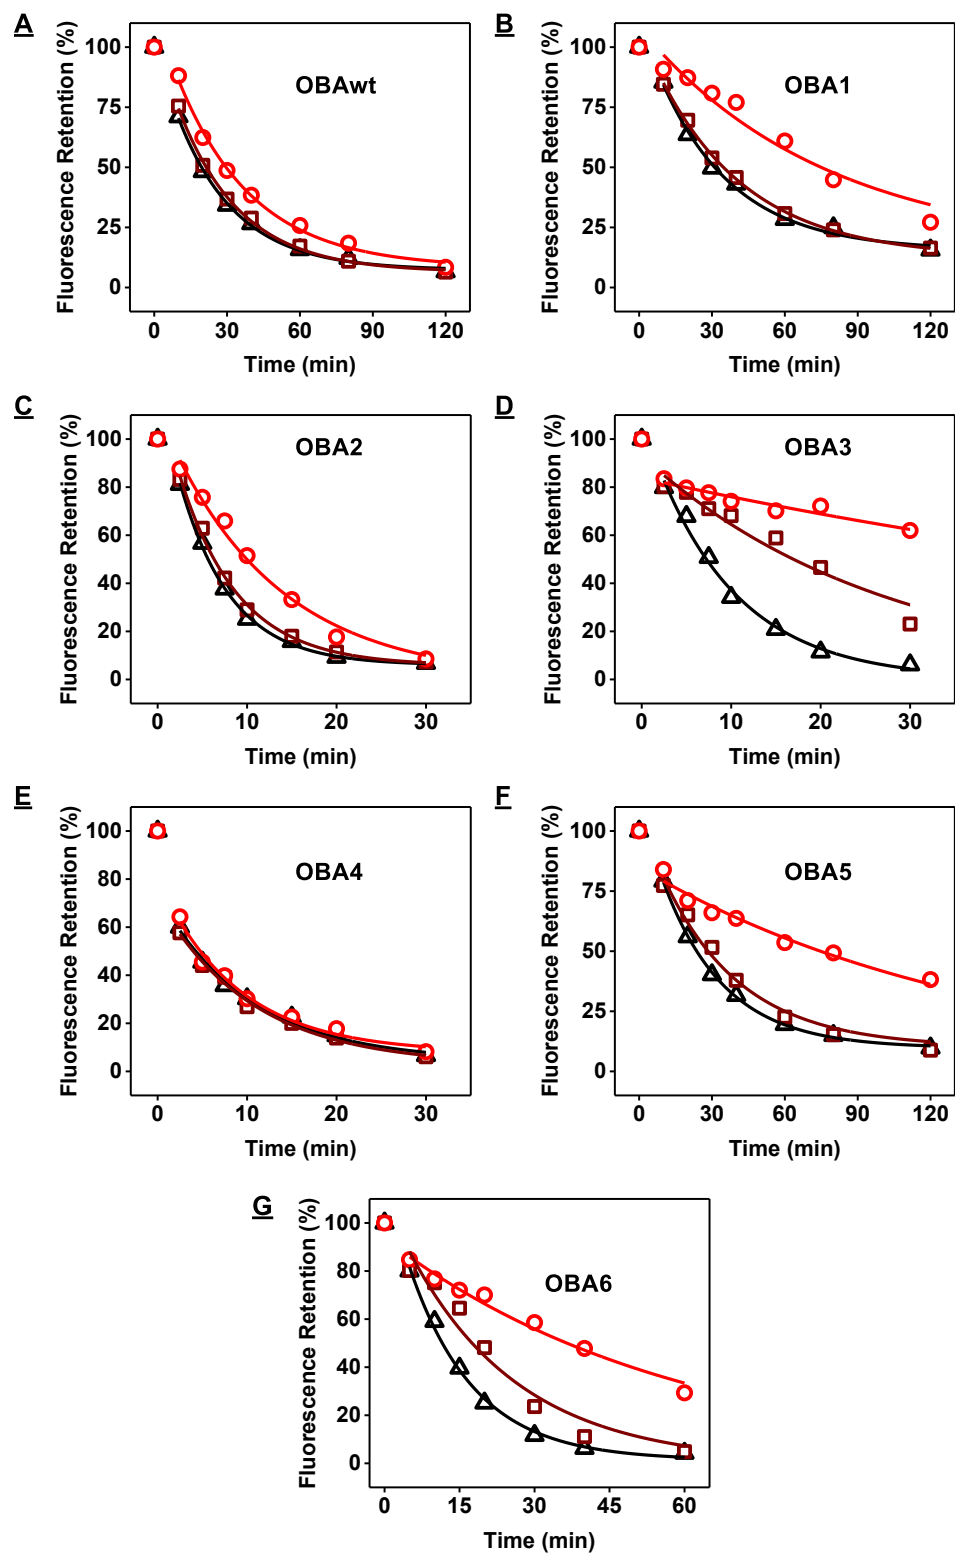

**Figure S3.** Evaluation of the binding profile of OTA-binding aptamers using the exonuclease digestion assay. Digestion of (A) OBAwt, (B) OBA1, (C) OBA2, (D) OBA3, (E) OBA4, (F) OBA5, and (G) OBA6 with the mixture of Exo III and Exo I in the absence (black triangles) or presence of 100 μM OTA (red circles) or 100 μM ochratoxin B (OTB) (burgundy squares).



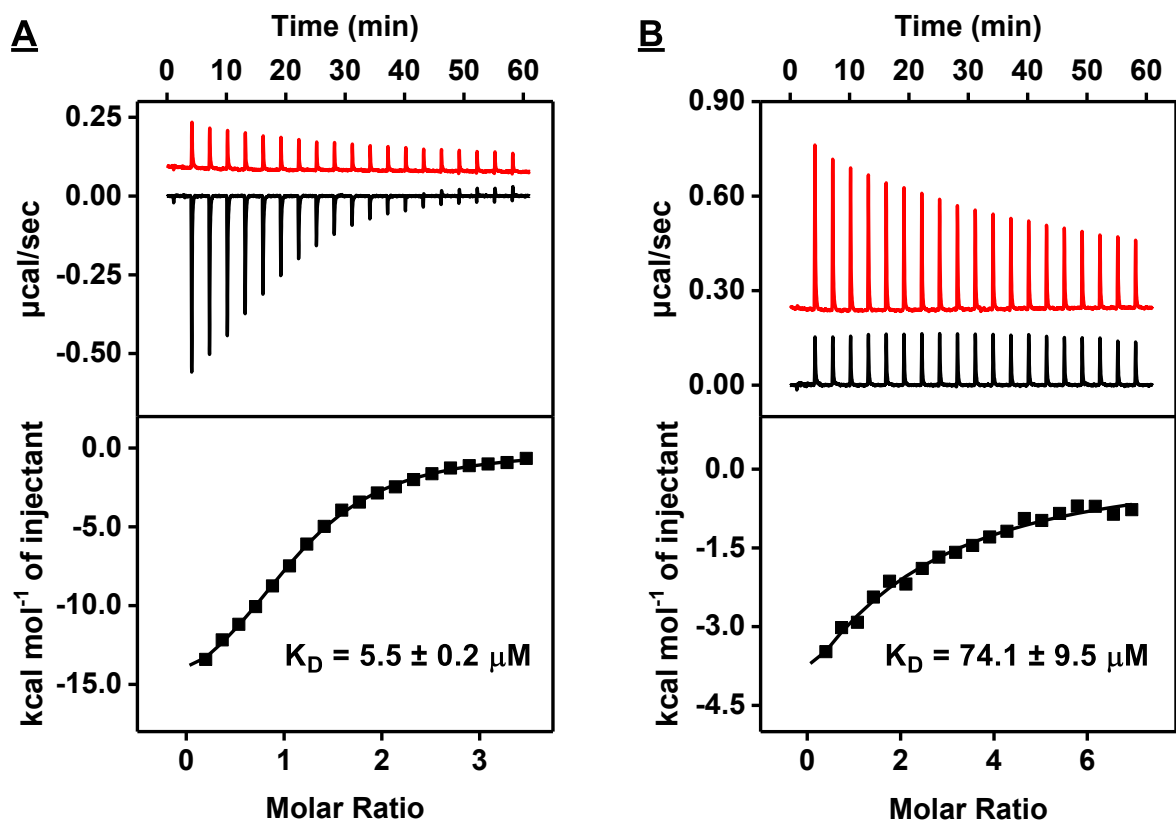

**Figure S4.** Characterization of OBA1 affinity for OTA and OTB using isothermal titration calorimetry (ITC). Top panels display the heat generated from each titration of OBA1 to (A) buffer (red) or OTA (black) and (B) buffer (red) or OTB (black). Bottom panels show the integrated heat of each titration after correcting for the heat of dilution of the titrant.

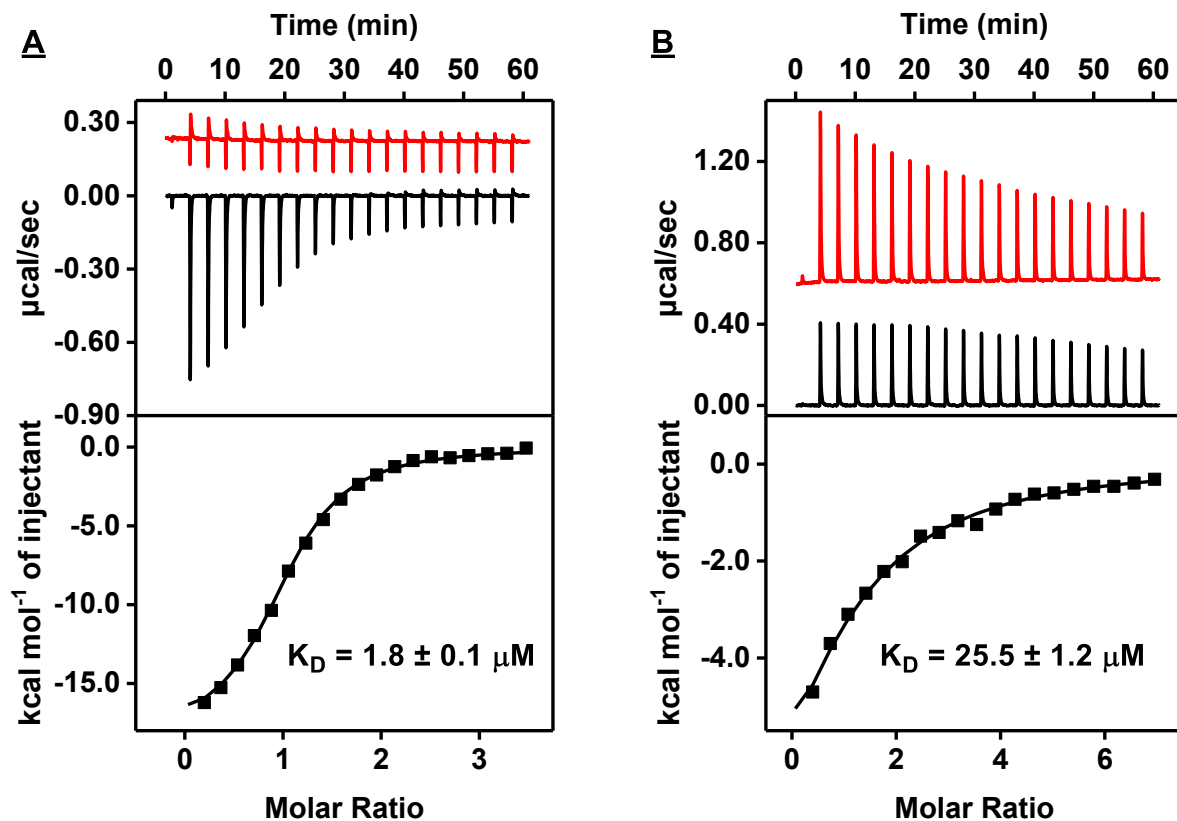

**Figure S5.** Characterization of OBA3 affinity for OTA and OTB using ITC. Top panels display the heat generated from each titration of OBA3 to (A) buffer (red) or OTA (black) and (B) buffer (red) or OTB (black). Bottom panels show the integrated heat of each titration after correcting for the heat of dilution of the titrant.

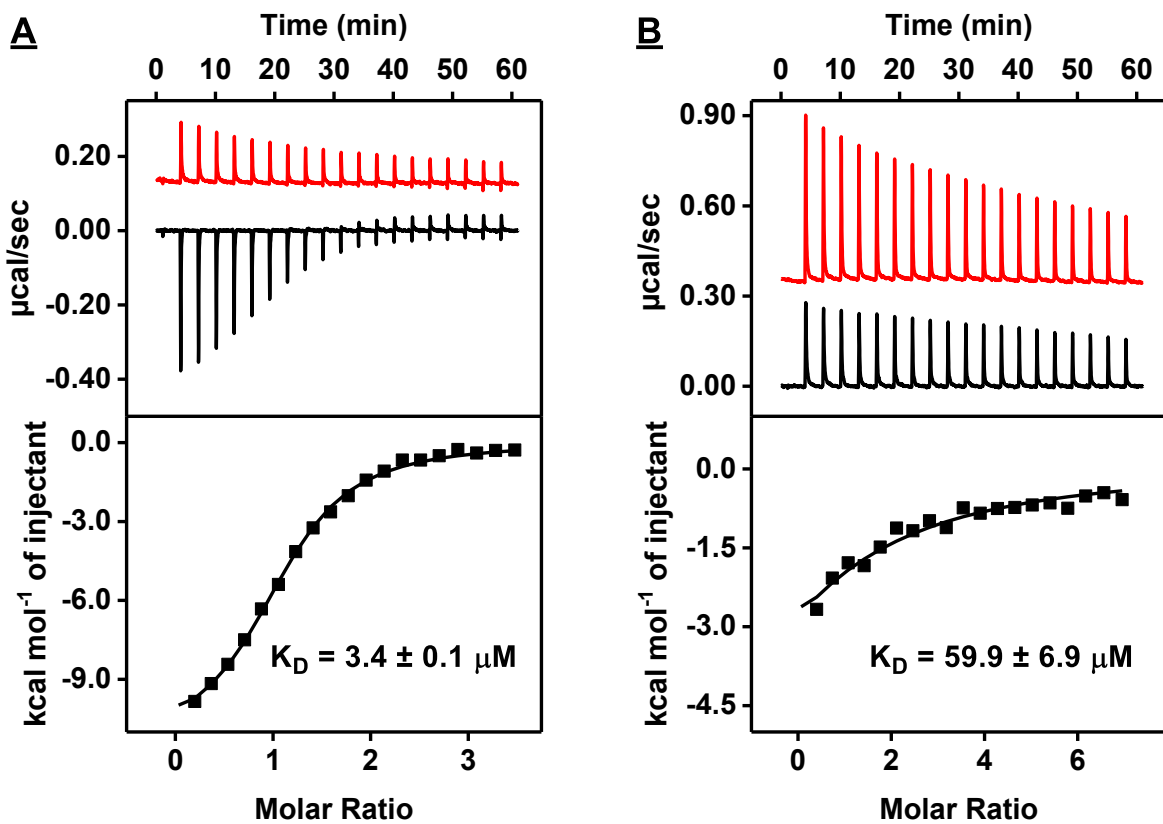

**Figure S6.** Characterization of OBA5 affinity for OTA and OTB using ITC. Top panels display the heat generated from each titration of OBA5 to (A) buffer (red) or OTA (black) and (B) buffer (red) or OTB (black). Bottom panels show the integrated heat of each titration after correcting for the heat of dilution of the titrant.

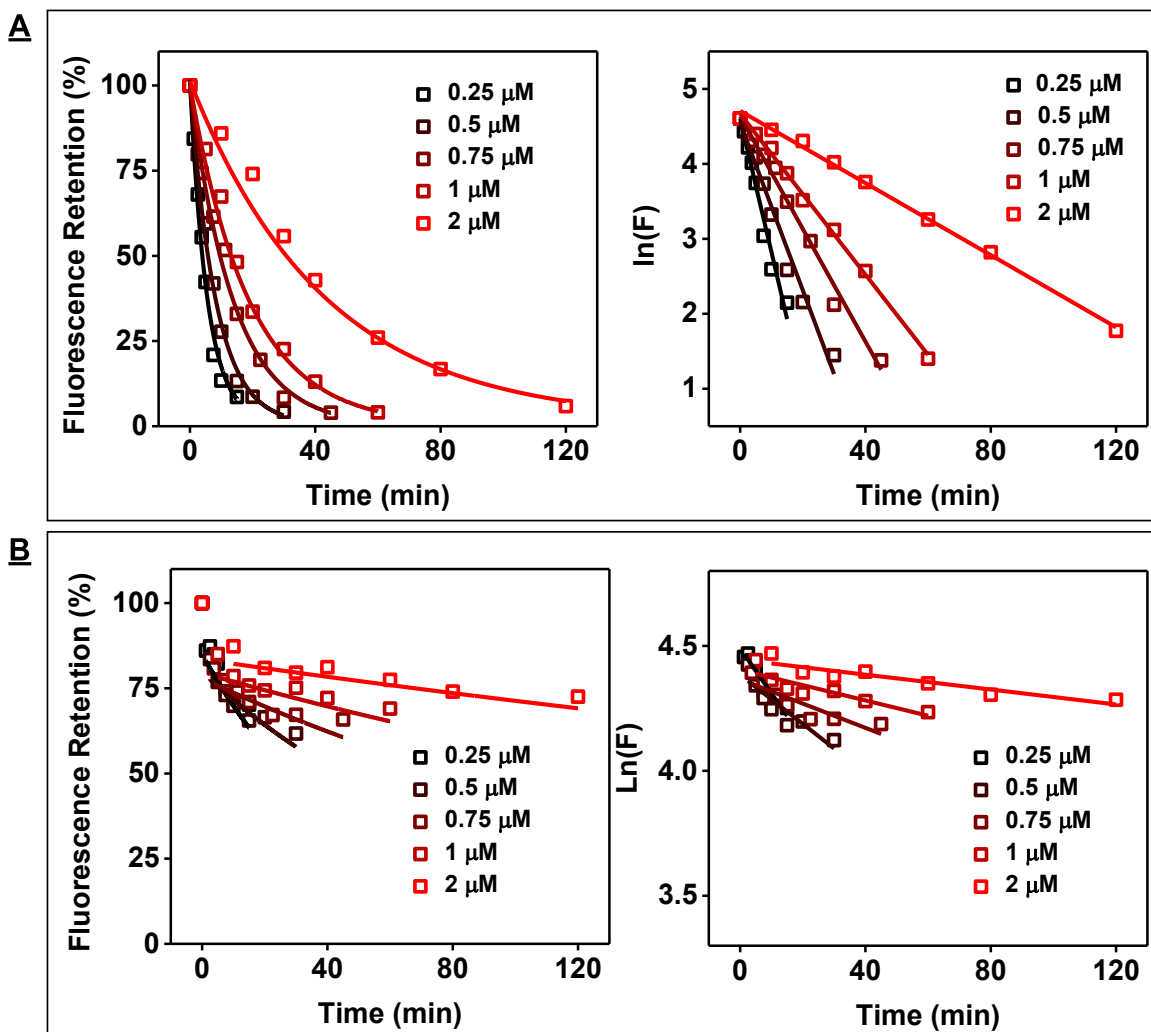

**Figure S7.** Characterization of ATPwt digestion kinetics by Exo III and Exo I. Time-course digestion (left) of 0.25, 0.5, 0.75, 1, or 2  $\mu\text{M}$  ATPwt (indicated by the black to red color gradient) and natural log plot (right) of digestion progress (A) in the absence and (B) presence of 250  $\mu\text{M}$  ATP.

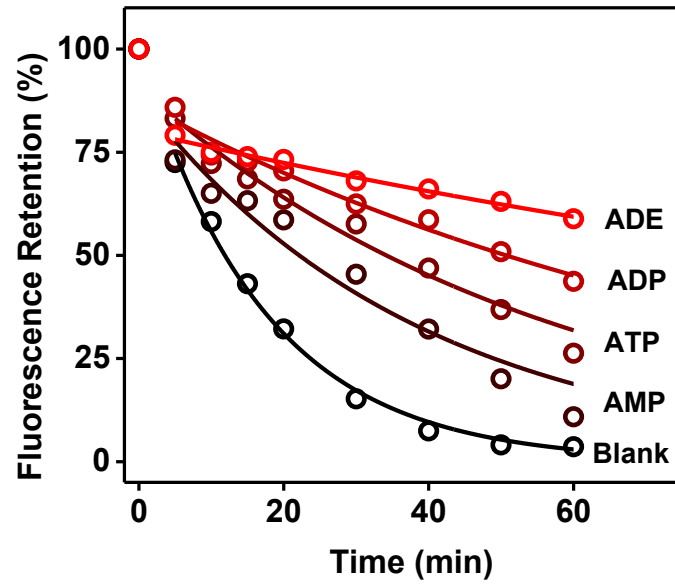

**Figure S8.** Digestion of ATPwt with Exo III and Exo I in the absence and presence of 100  $\mu$ M ADE, AMP, ADP, or ATP.

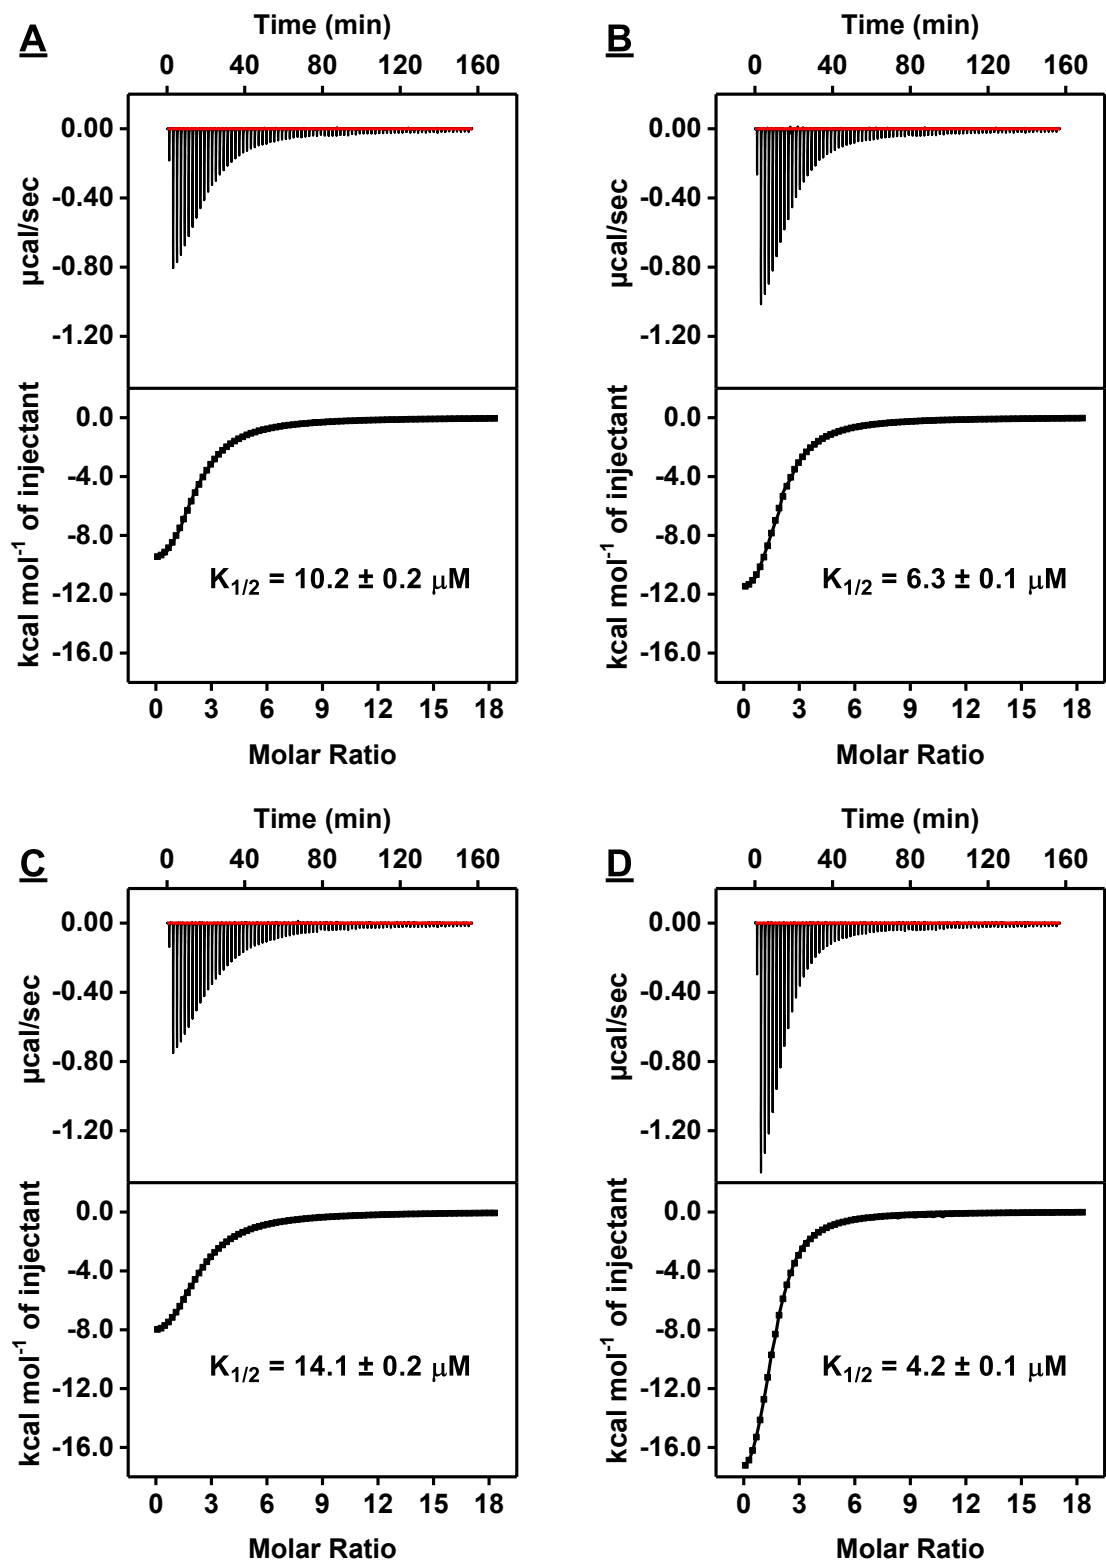

**Figure S9.** Characterization of affinity of ATPwt to ATP, ADP, AMP, and ADE using ITC. Top panels display the heat generated from each titration of (A) ATP, (B) ADP, (C) AMP, and (D) ADE to ATPwt. Bottom panels show the integrated heat of each titration after correcting for the heat of dilution of the titrant.

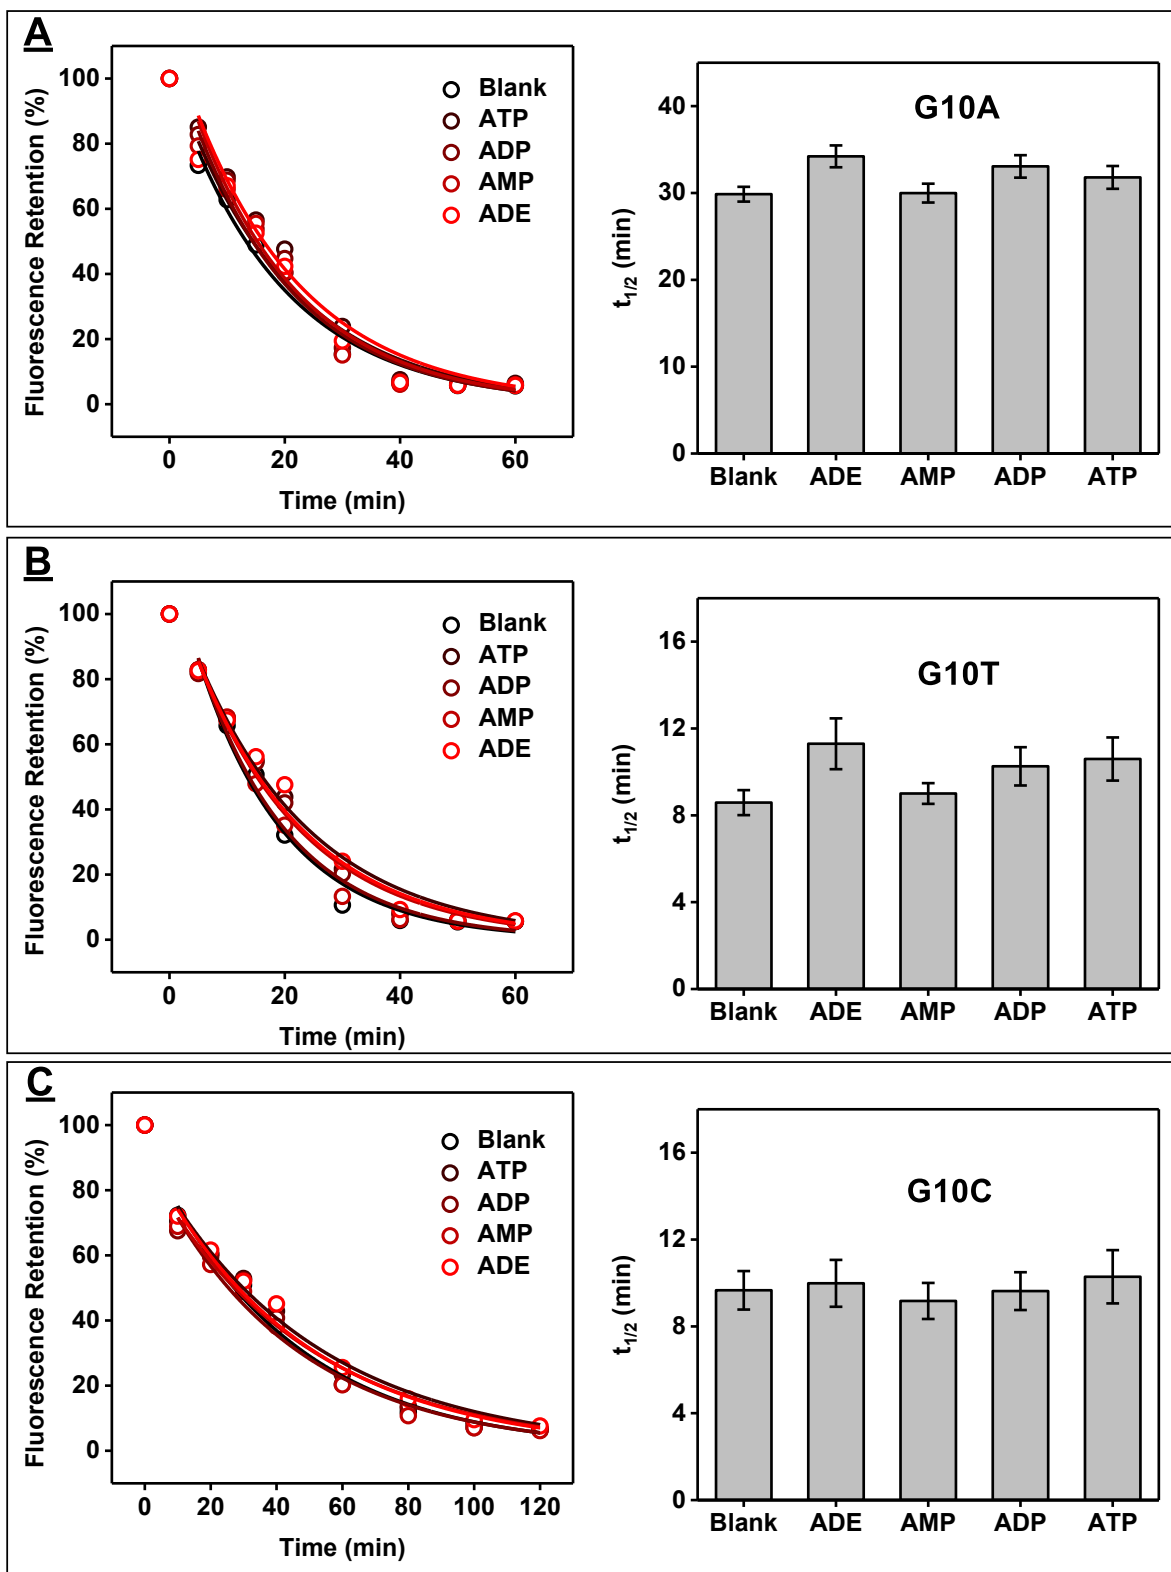

**Figure S10.** Evaluating the binding profile of various G10 mutant aptamers using the exonuclease digestion assay. Fluorescence time-course for the digestion (left) and calculated  $t_{1/2}$  (right) of (A) G10A, (B) G10T, and (C) G10C in the absence or presence of 250  $\mu$ M ATP, ADP, AMP, or ADE.

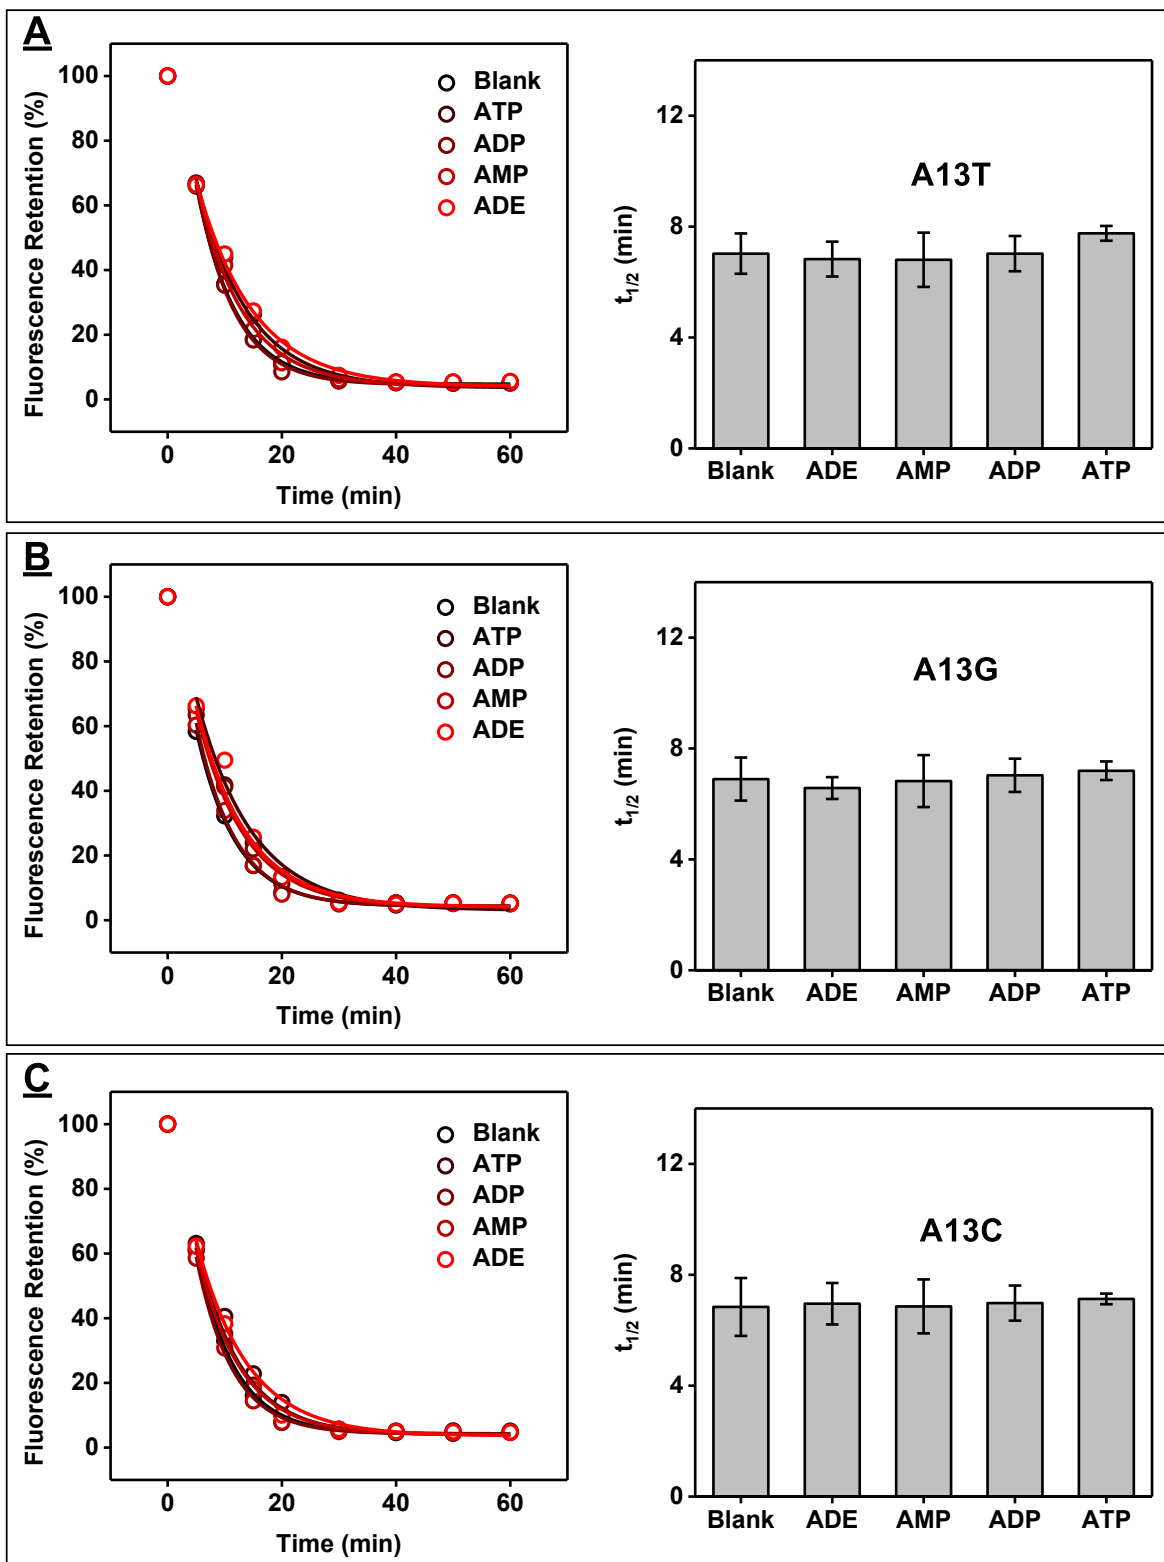

**Figure S11.** Evaluating the binding profile of various A13 mutant aptamers using the exonuclease digestion assay. Fluorescence time-course for the digestion (left) and calculated  $t_{1/2}$  (right) of (A) A13T, (B) A13G, and (C) A13C in the absence or presence of 250  $\mu$ M ATP, ADP, AMP, or ADE.



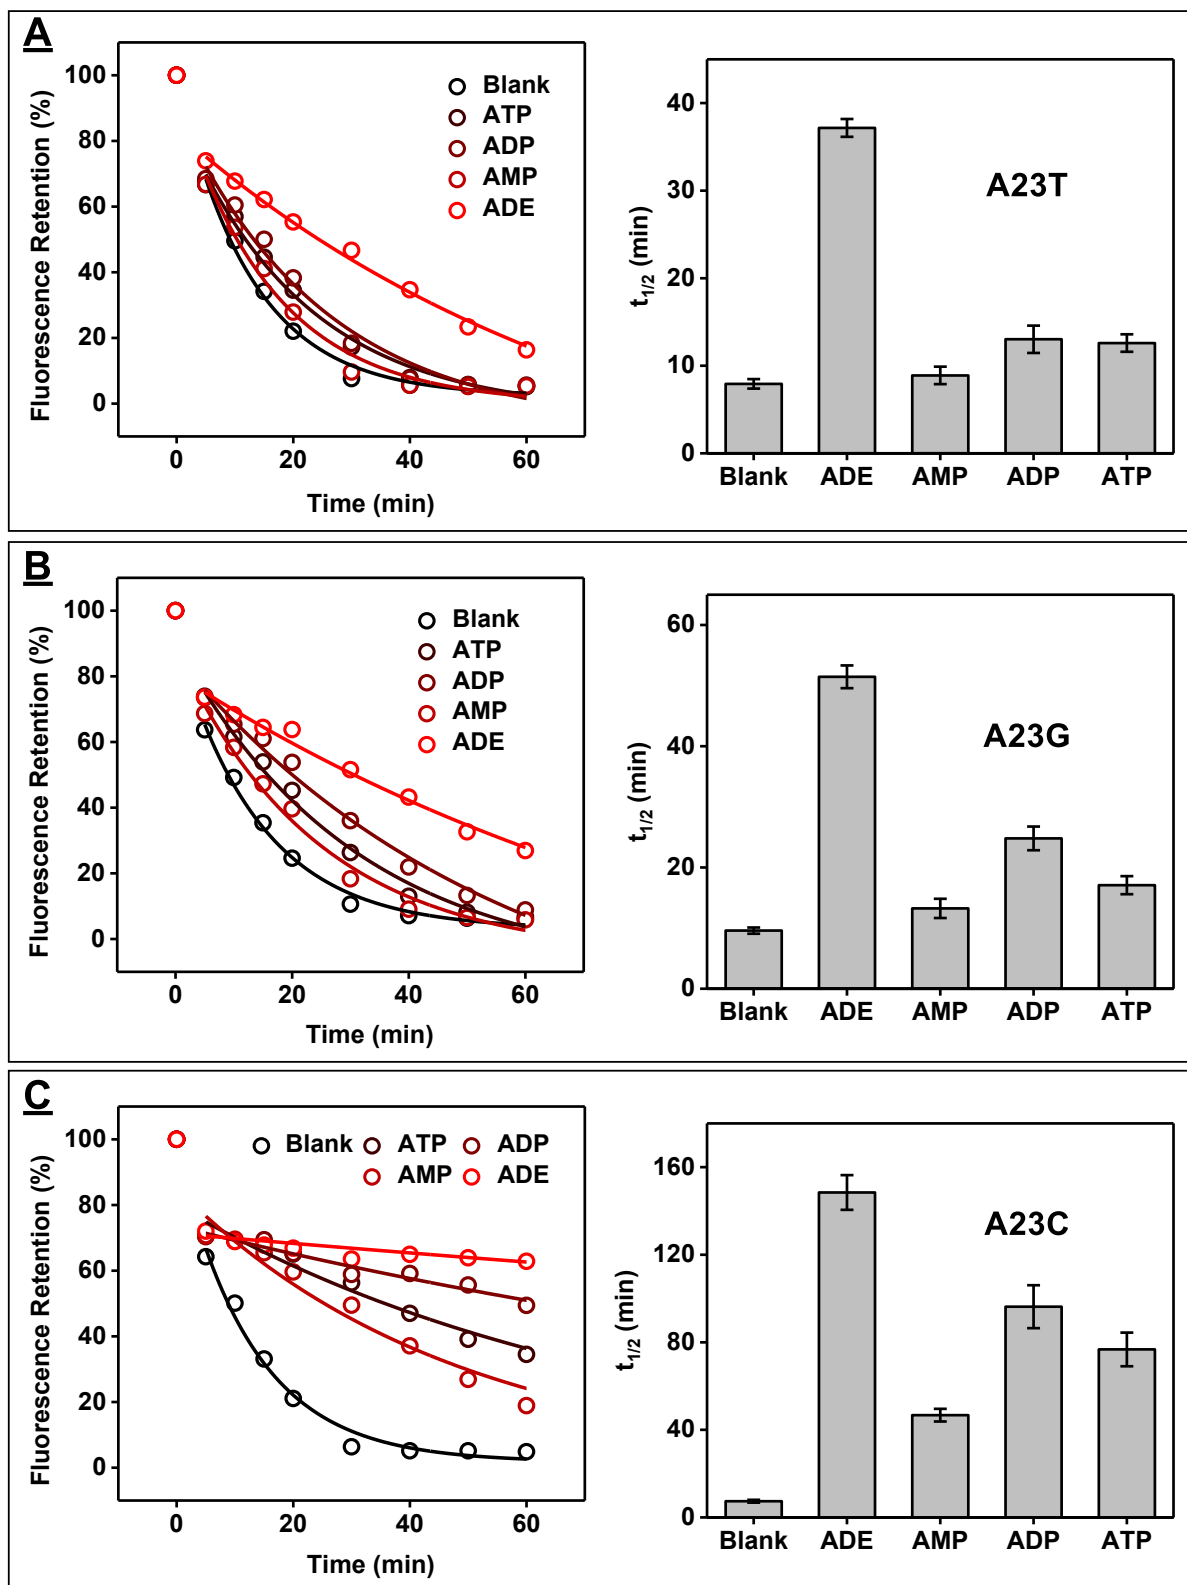

**Figure S12.** Evaluating the binding profile of various A23 mutant aptamers using the exonuclease digestion assay. Fluorescence time-course for the digestion (left) and calculated  $t_{1/2}$  (right) of (A) A23T, (B) A23G, and (C) A23C in the absence or presence of 250  $\mu$ M ATP, ADP, AMP, or ADE.

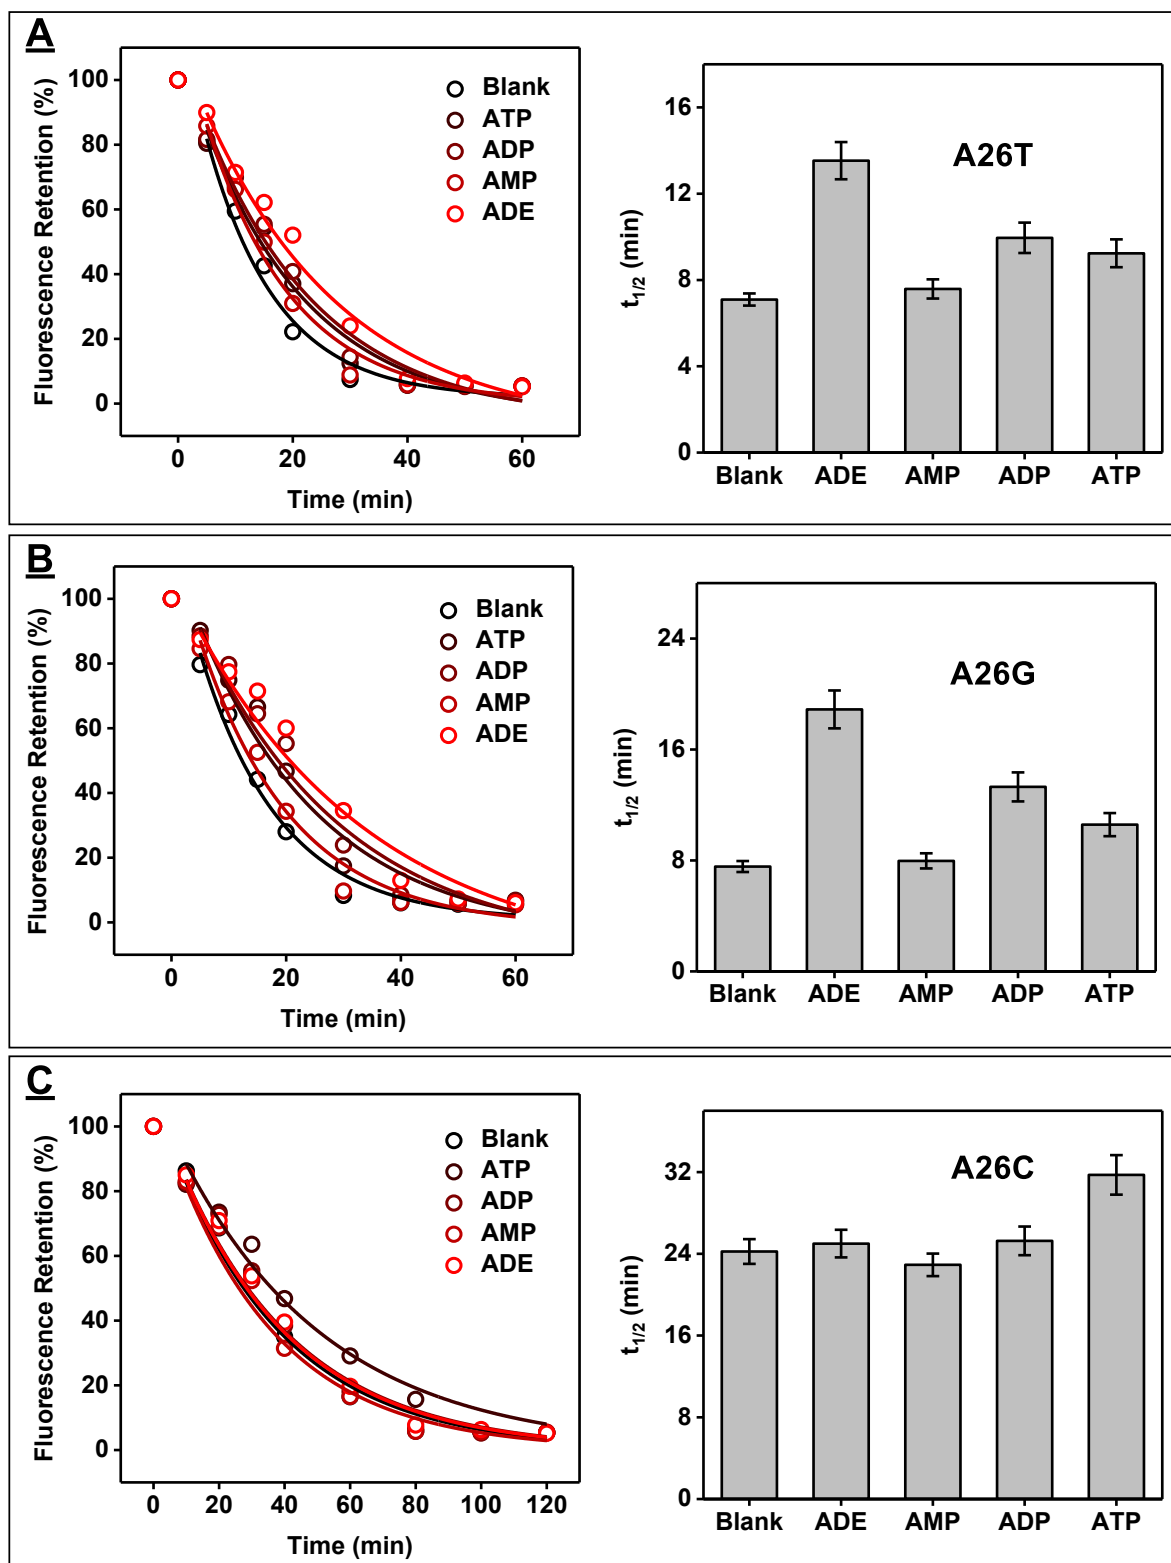

**Figure S13.** Evaluating the binding profile of various A26 mutant aptamers using the exonuclease digestion assay. Fluorescence time-course for the digestion (left) and calculated  $t_{1/2}$  (right) of (A) A26T, (B) A26G, and (C) A26C in the absence or presence of 250  $\mu$ M ATP, ADP, AMP, or ADE.

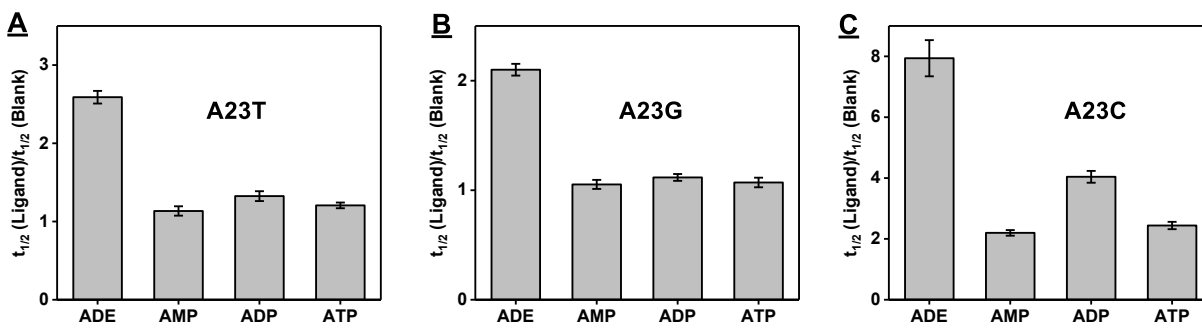

**Figure S14.** Binding profile of A23 mutants determined using the exonuclease digestion assay.  $t_{1/2}$  ratio of (A) A23T, (B) A23G, and (C) A23C in the presence of 100  $\mu\text{M}$  ATP, ADP, AMP, or ADE.

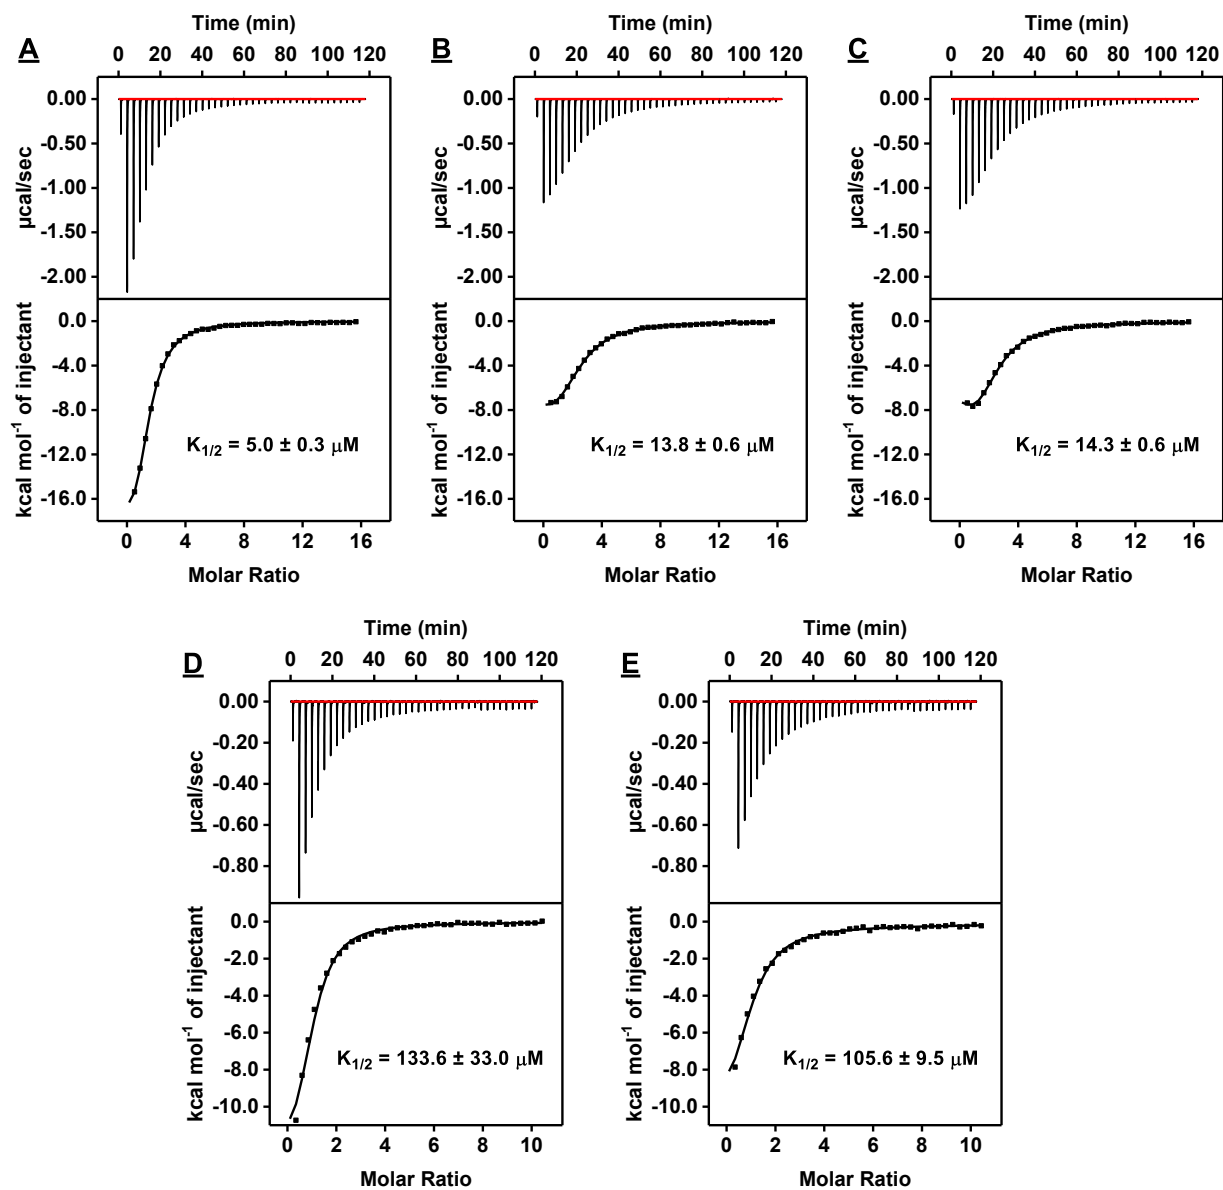

**Figure S15.** Characterization of affinity of single-site mutants for ADE using ITC. Top panels display the heat generated from each titration of ADE to (A) A23C, (B) A23G, (C) A23T, (D) A26G, and (E) A26T. Bottom panels show the integrated heat of each titration after correcting for the heat of dilution of the titrant.

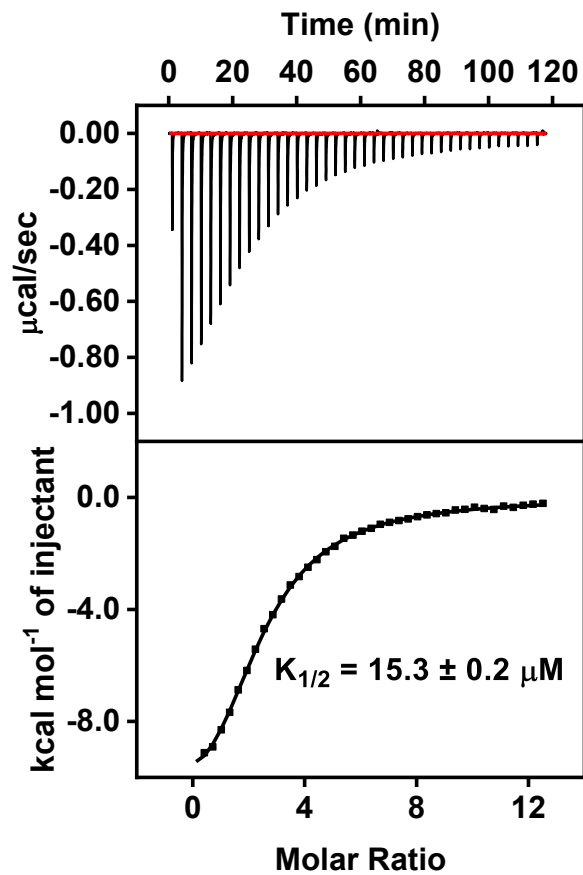

**Figure S16.** Characterization of affinity of G10T-A23G for ADE using ITC. Top panel displays the heat generated from each titration of ADE to G10T-A23G. Bottom panel shows the integrated heat of each titration after correcting for the heat of dilution of the titrant.

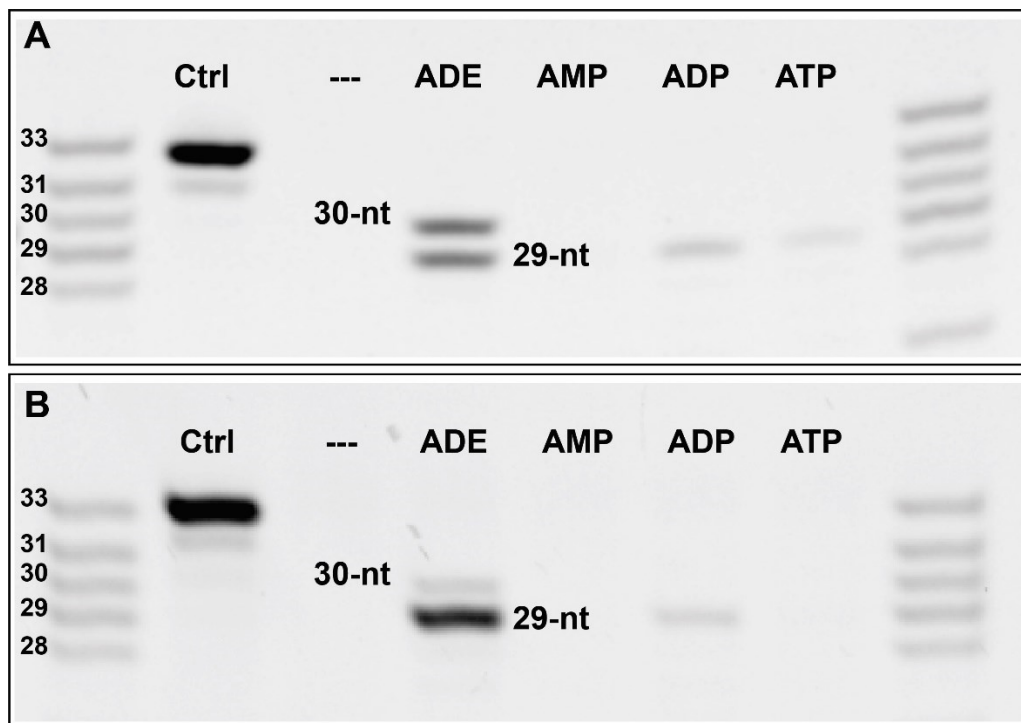

**Figure S17.** PAGE analysis of (A) A23T and (B) G10T-A23G products after 30 min of digestion with Exo III and Exo I in the absence or presence of 250  $\mu$ M ADE, AMP, ADP, or ATP.

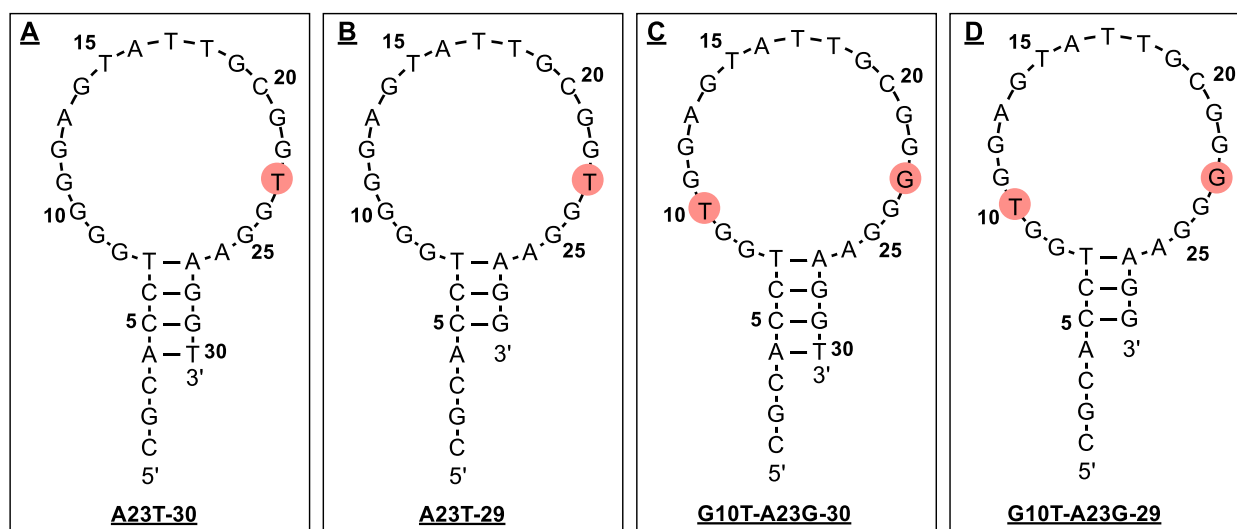

**Figure S18.** Sequence and secondary structure of (A) A23T-30, (B) A23T-29, (C) G10T-A23G-30, and (D) G10T-A23G-29. Mutated nucleotides are marked in red.

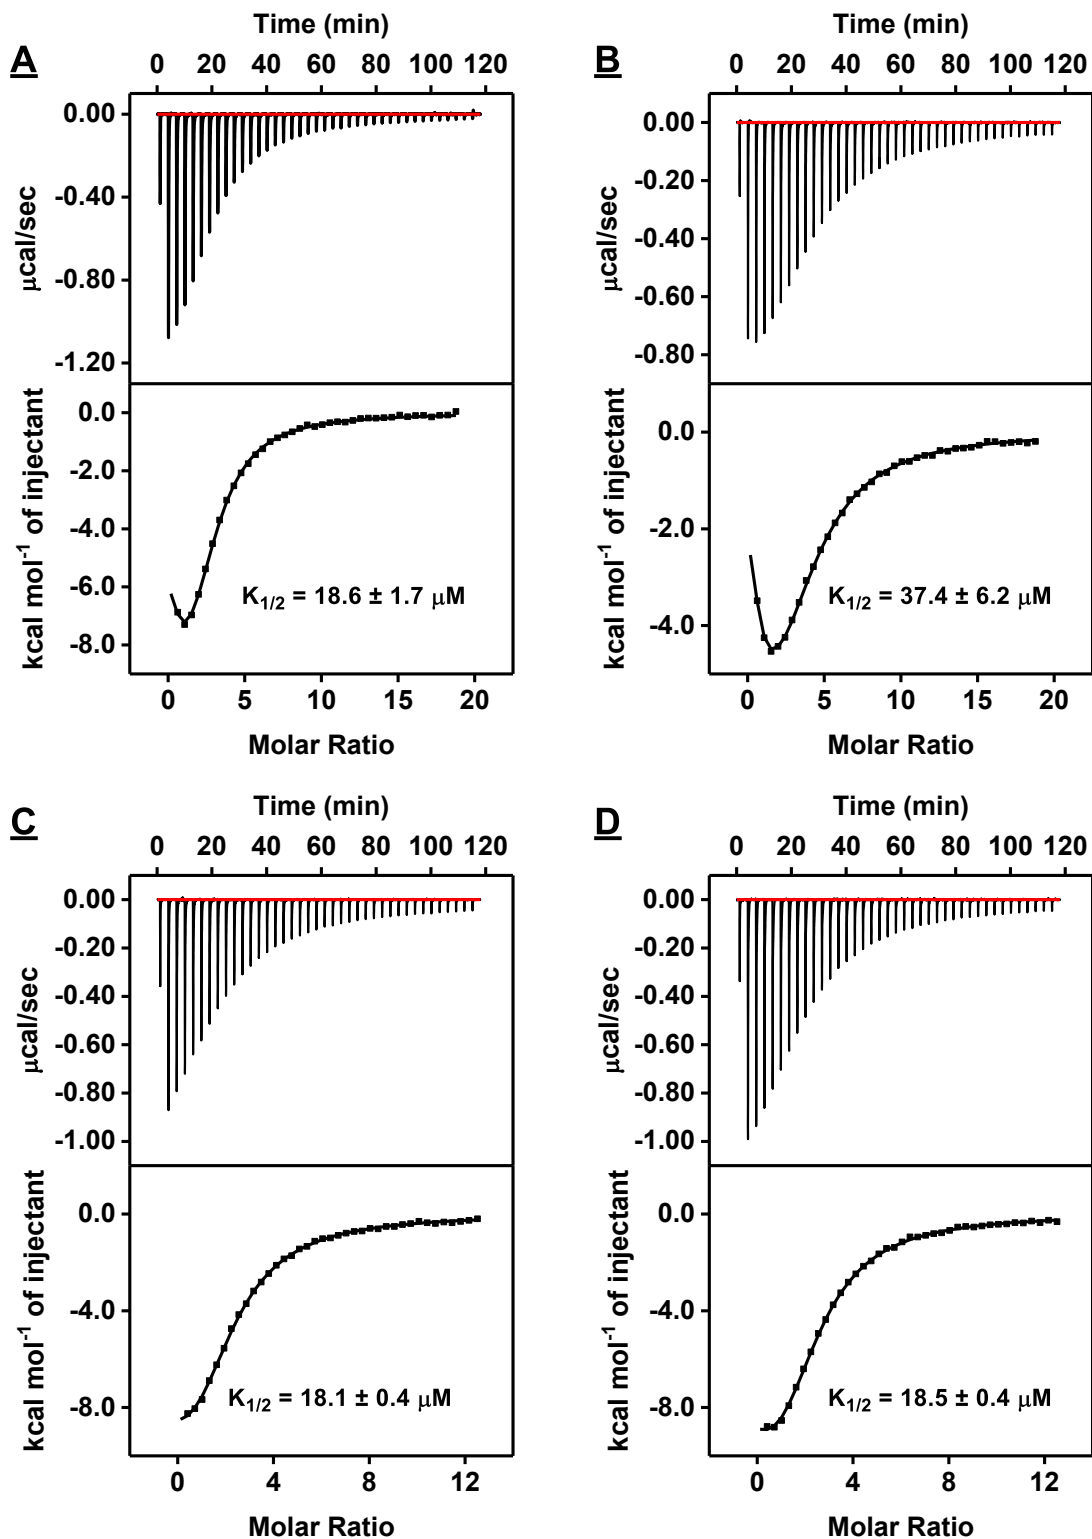

**Figure S19.** Characterization of affinity of ADE-specific aptamer mutants using ITC. Top panels display the heat generated from each titration of ADE to (A) A23T-30, (B) A23T-29, (C) G10T-A23G-30, and (D) G10T-A23G-29. Bottom panels show the integrated heat of each titration after correcting for the heat of dilution of the titrant.

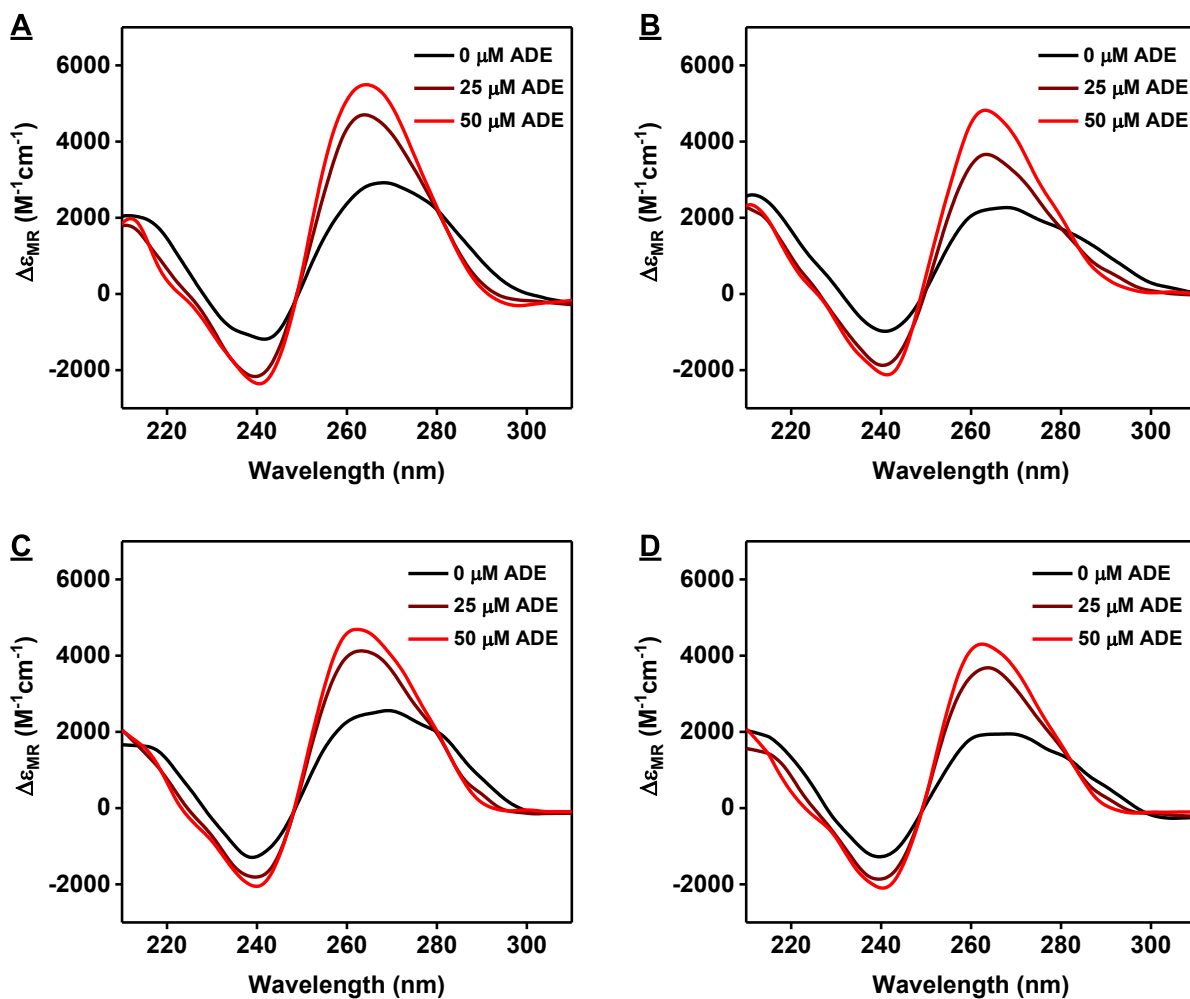

**Figure S20.** Characterizing structure-switching functionality of A23T and G10T-A23G digestion products using CD spectroscopy. CD spectra of (A) A23T-30, (B) A23T-29, (C) G10T-A23G-30, and (D) G10T-A23G-29 in the absence or presence of various concentrations of ADE.



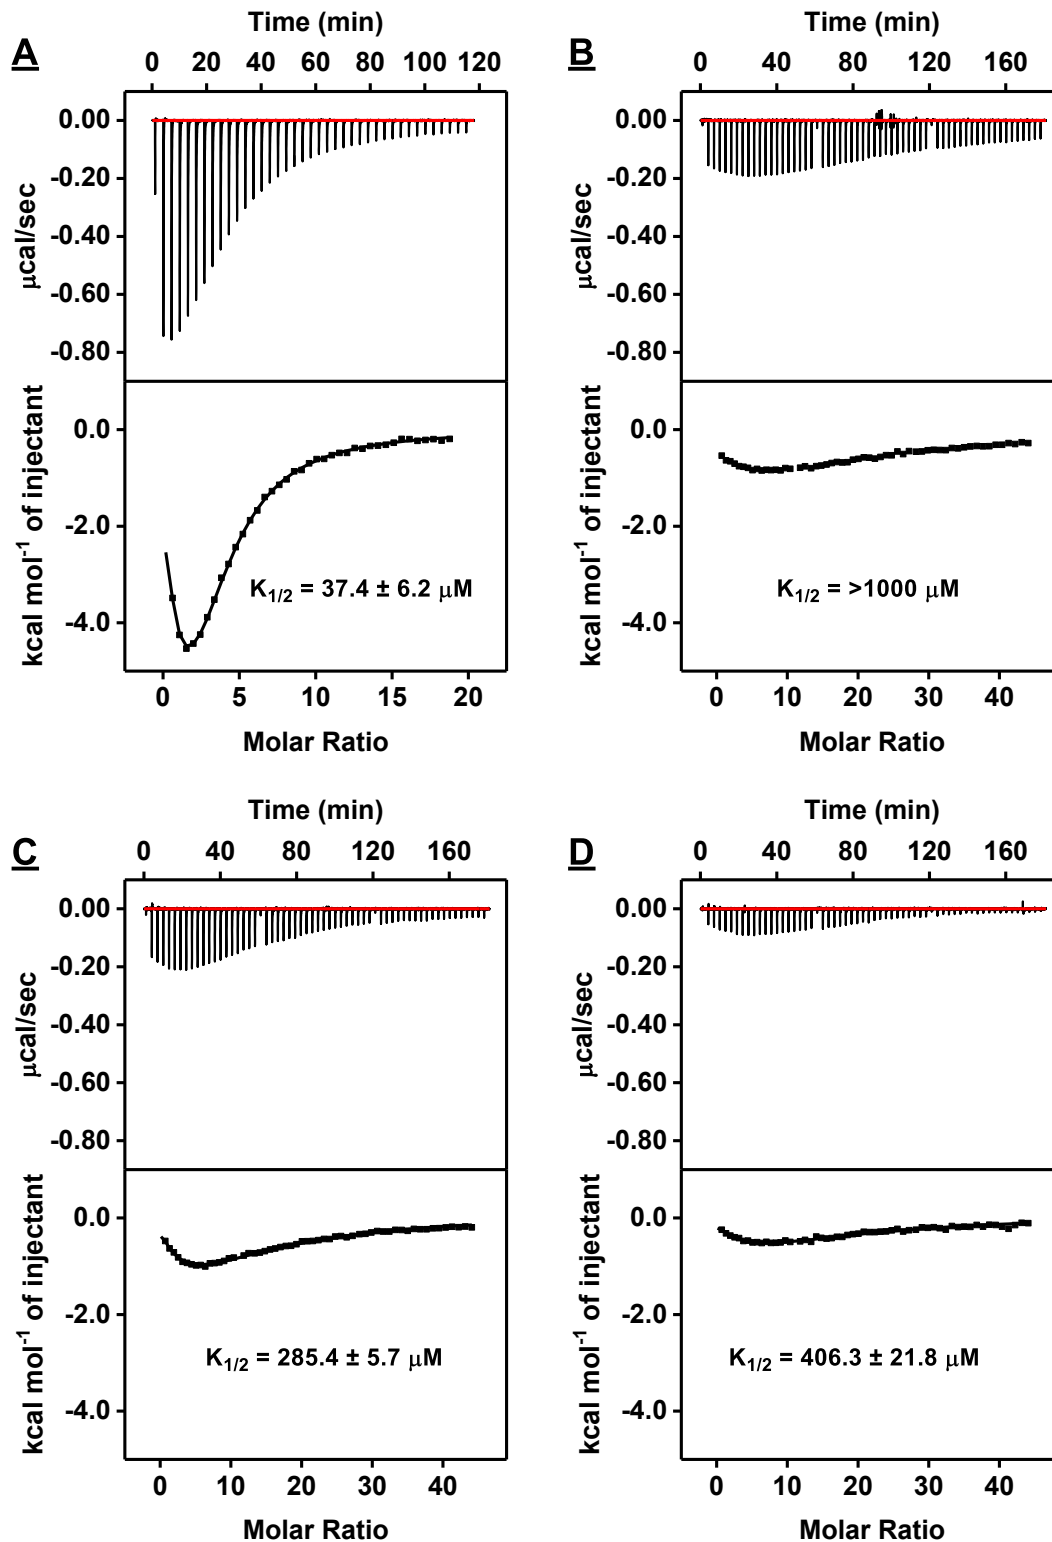

**Figure S21.** Characterization of A23T-29 affinity using ITC. Top panels display the heat generated from each titration of (A) ADE, (B) AMP, (C) ADP, and (D) ATP to A23T-29. Bottom panels show the integrated heat of each titration after correcting for the heat of dilution of the titrant.

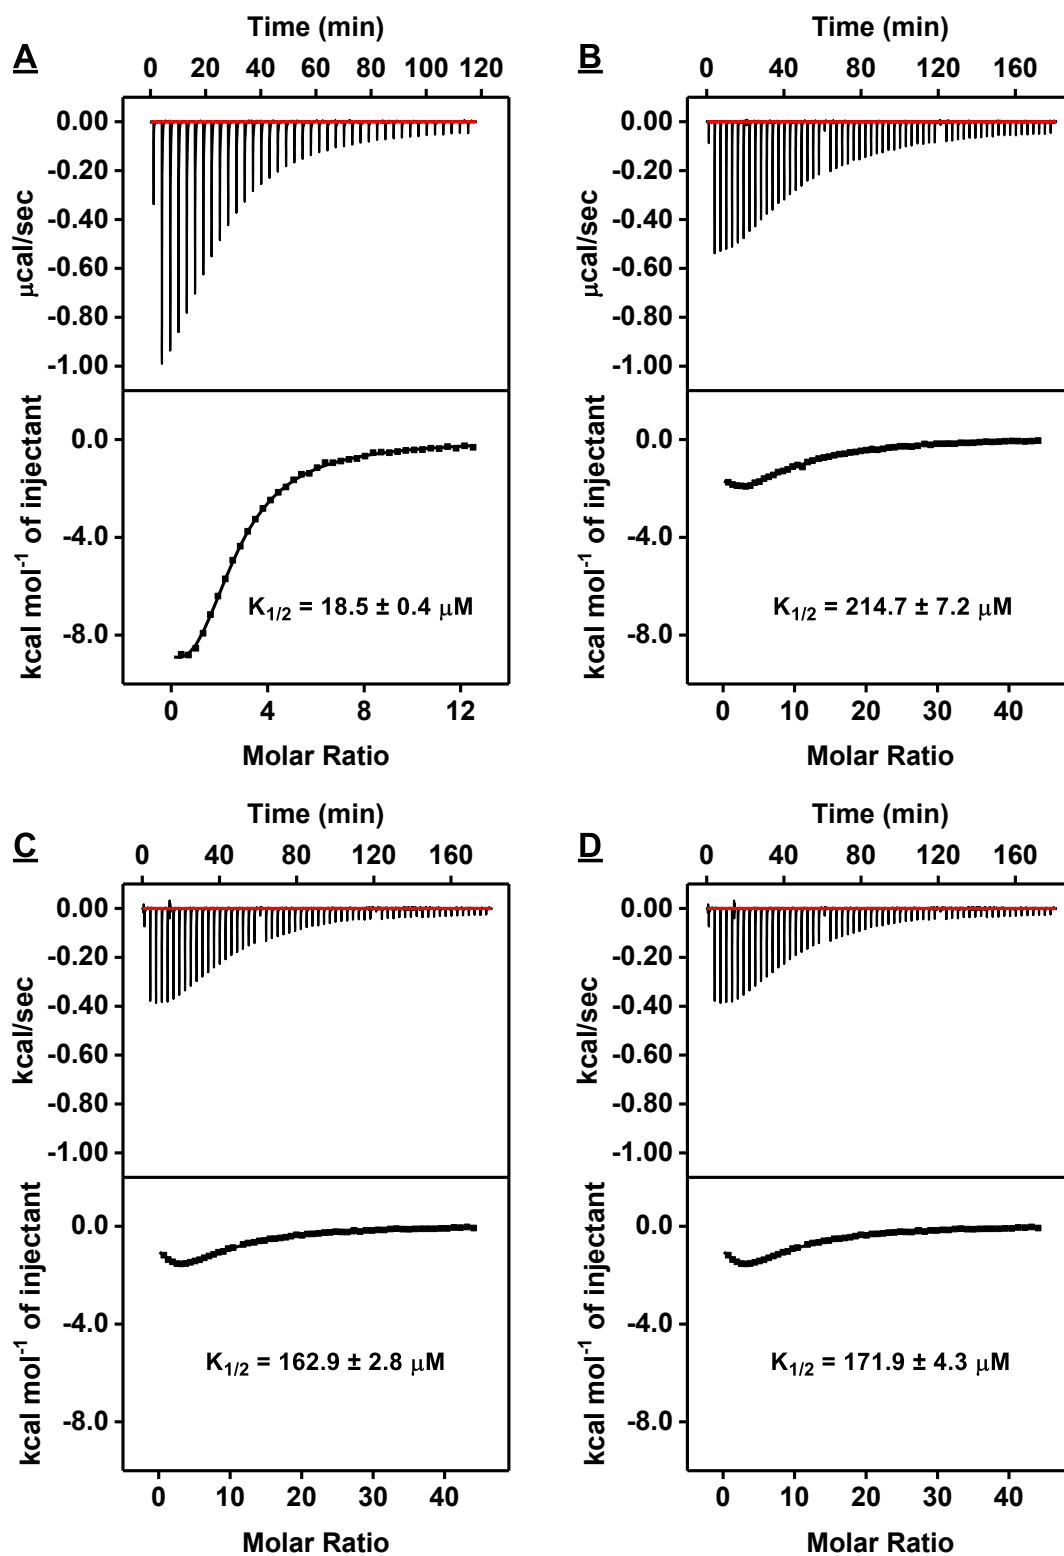

**Figure S22.** Characterization of G10T-A23G-29 affinity using ITC. Top panels display the heat generated from each titration of (A) ADE, (B) AMP, (C) ADP, and (D) ATP to G10T-A23G-29. Bottom panels show the integrated heat of each titration after correcting for the heat of dilution of the titrant.

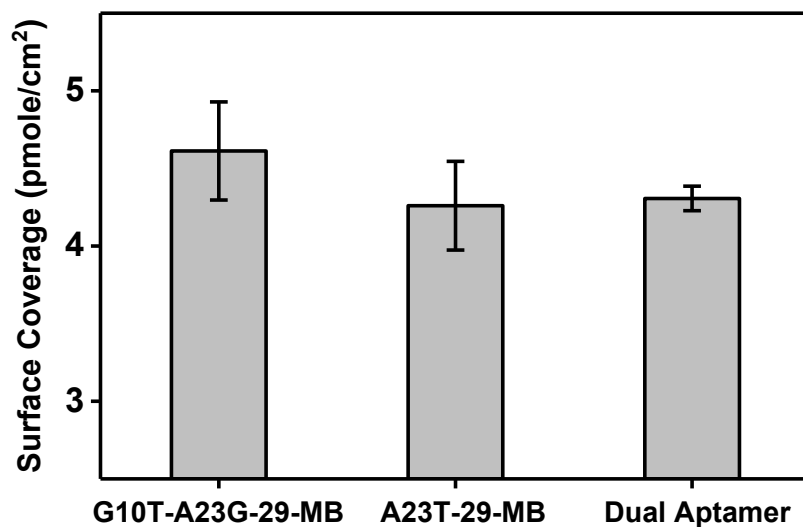

**Figure S23.** Surface coverage of E-AB sensors fabricated using G10T-A23G-29-MB, A23T-29-MB, or both. The average DNA length was used when calculating the surface coverage of sensors fabricated using both aptamers. Error bars represent the standard deviation of the measurements of three different electrodes.

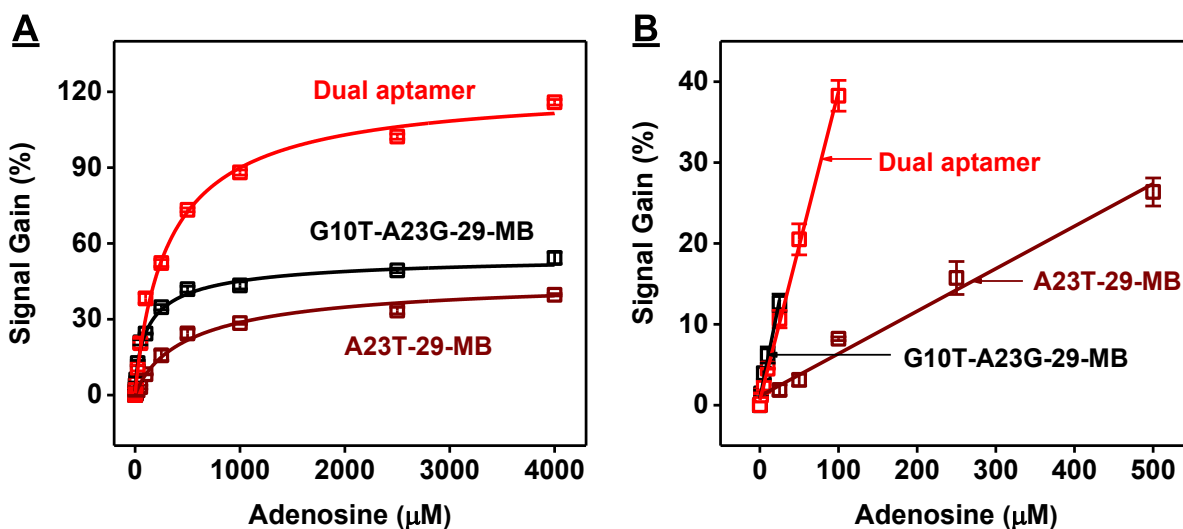

**Figure S24.** Performance of E-AB sensors fabricated using G10T-A23G-29-MB, A23T-29-MB, or a mixture of both aptamers. (A) Calibration curve and (B) linear range of the three sensors for the detection of various concentrations of ADE in buffer. Error bars represent the average standard deviation of three electrodes.

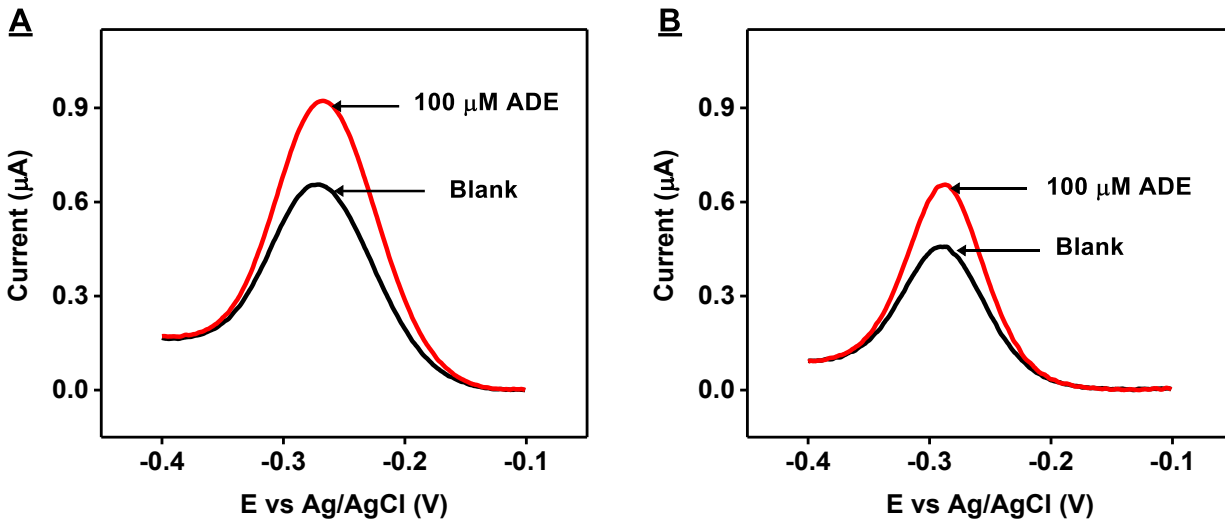

**Figure S25.** SWV curves in the absence (black) or presence (red) of 100  $\mu\text{M}$  ADE in (A) buffer or (B) 50% serum using dual-aptamer E-AB sensors constructed with A23T-29-MB and G10T-A23G-29-MB.

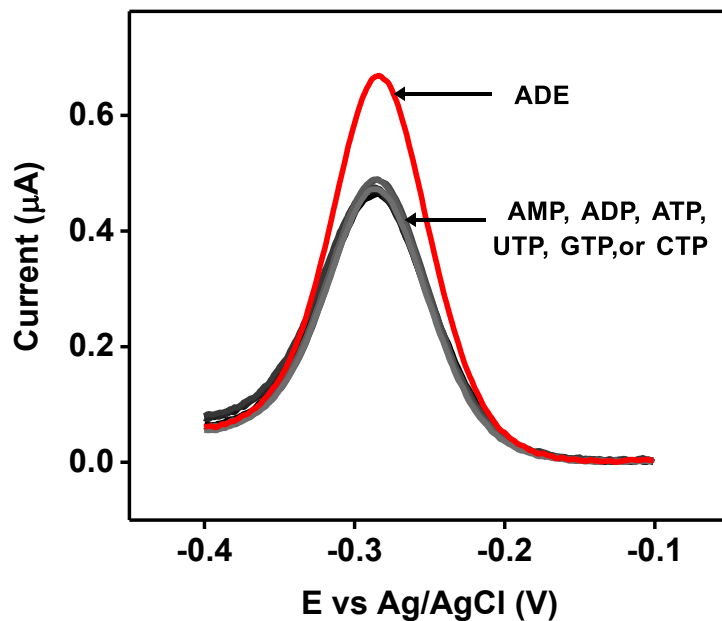

**Figure S26.** Dual-aptamer E-AB sensor response to 100  $\mu\text{M}$  ADE, AMP, ADP, or ATP or other nucleotide triphosphates in 50% serum.

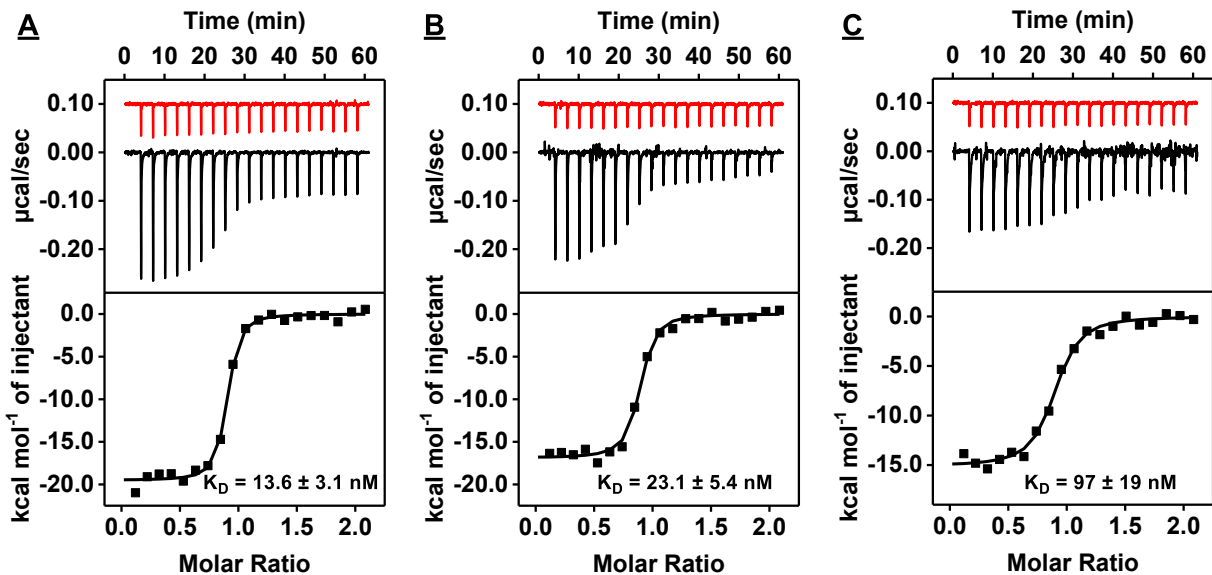

**Figure S27.** Characterization of the thrombin-binding affinity of Tasset, Bock, and Bock-hang using isothermal titration calorimetry (ITC). Top panels display the heat generated from each titration of (A) Tasset, (B) Bock and (C) Bock-hang to buffer (red) or thrombin (black). Bottom panels show the integrated heat of each titration after correcting for the heat of dilution of the titrant.

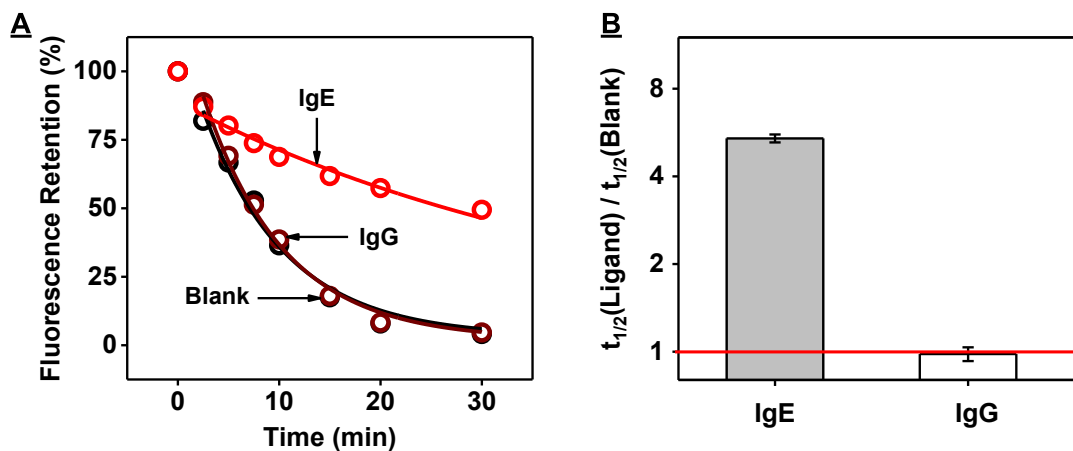

**Figure S28.** Exonuclease-based fluorescence profiling of an IgE-binding aptamer. (A) Time-course plot of aptamer digestion by Exo III and Exo I in the absence (black) and presence of 500 nM human IgE (red) or IgG (brown). (B)  $t_{1/2}$  ratios calculated from plot A. The y-axis is  $\log_2$  scaled. The red line indicates a  $t_{1/2}$  ratio of 1, which means there was no inhibition of aptamer digestion.

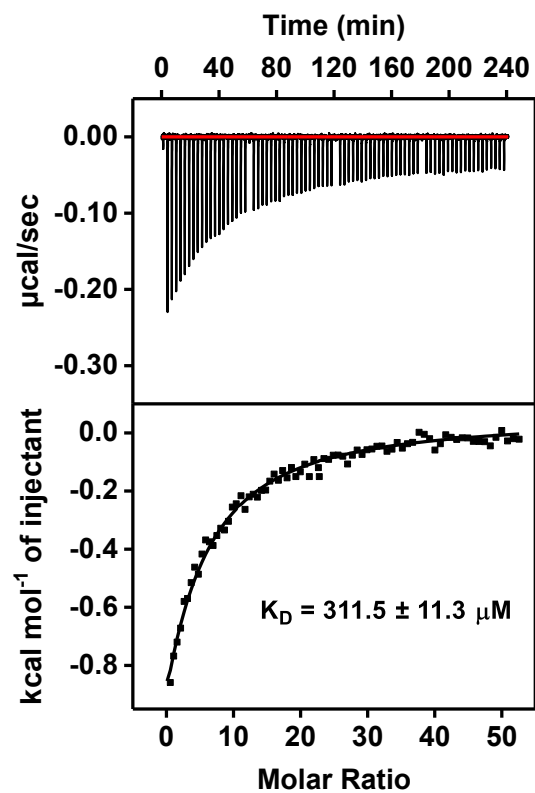

**Figure S29.** Characterization of ligand-binding affinity of a recently published ADE-binding aptamer (A10-excised) (*Chem. Sci.*, 2020, 11, 2735-2743) to ADE using ITC at room temperature. Top panel displays the heat generated from each titration of ADE to the aptamer. Bottom panel shows the integrated heat of each titration after correcting for the heat of dilution of the titrant. Buffer: 10 mM Tris-HCl, pH 7.4, 20 mM NaCl and 1.5 mM MgCl<sub>2</sub>.

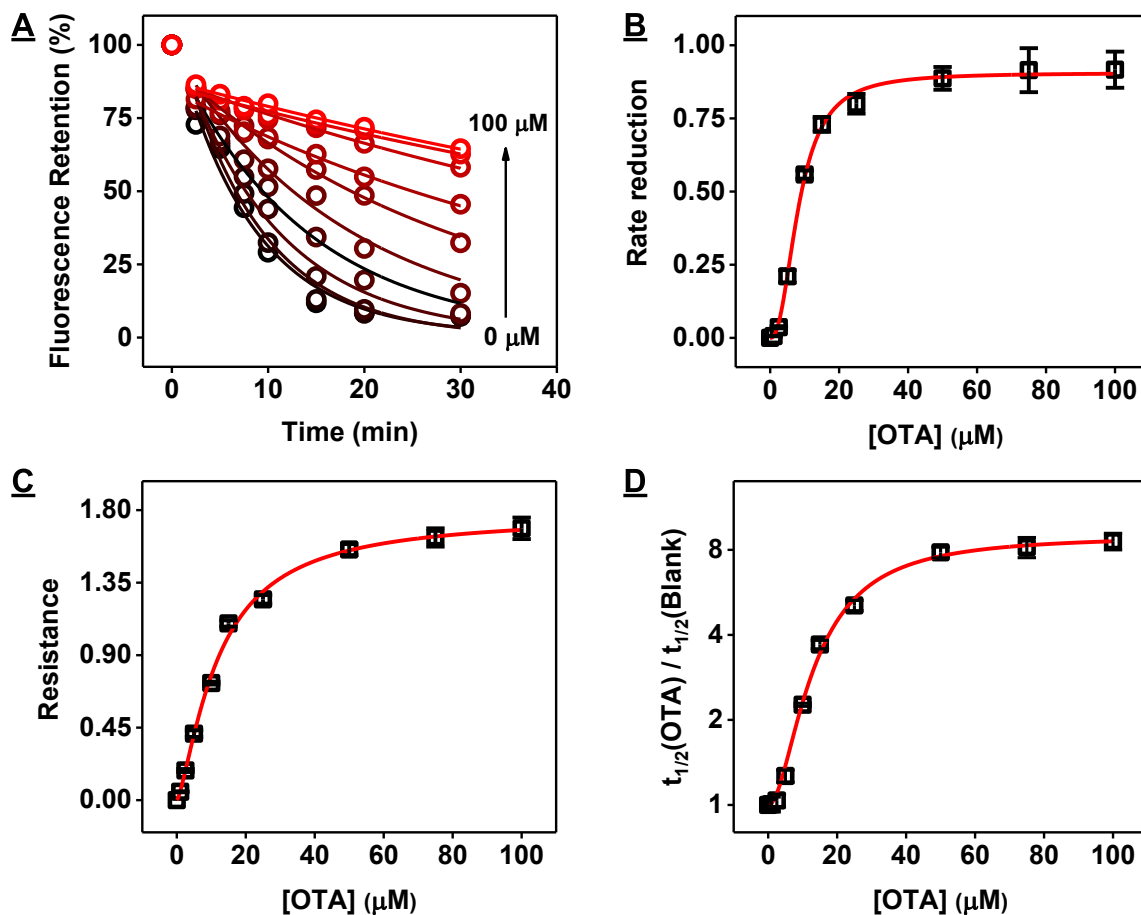

**Figure S30.** Characterization of OBA3 affinity for OTA using the exonuclease digestion assay. (A) Fluorescence time-course of the digestion of 1  $\mu\text{M}$  OBA3 in the absence and presence of 0, 1, 2.5, 5, 10, 15, 25, 50, 75 and 100  $\mu\text{M}$  OTA (indicated by black to red color gradient). Data analysis performed by plotting (B) reduction in first-order reaction rate of aptamer digestion ( $1 - k_{\text{OTA}}/k_{\text{blank}}$ ); (C) the aptamer's resistance to digestion based on the area under the curve (AUC) of fluorescence digestion plots ( $(\text{AUC}_{\text{OTA}}/\text{AUC}_{\text{blank}}) - 1$ ); and (D)  $t_{1/2}$  ratio at each ligand concentration.
